# 1 Evolutionary dynamics of transposable elements in bdelloid rotifers

2  
3 Reuben W. Nowell<sup>1,2,\*</sup>, Christopher G. Wilson<sup>1,2</sup>, Pedro Almeida<sup>2,3</sup>, Philipp H. Schiffer<sup>4</sup>, Diego  
4 Fontaneto<sup>5</sup>, Lutz Becks<sup>6,7</sup>, Fernando Rodriguez<sup>8</sup>, Irina R. Arkhipova<sup>8</sup>, and Timothy G.  
5 Barraclough<sup>1,2,\*</sup>

6  
7 <sup>1</sup>Department of Zoology, University of Oxford, 11a Mansfield Road, Oxford, United Kingdom. <sup>2</sup>Department of Life  
8 Sciences, Imperial College London, Silwood Park Campus, Ascot, Berkshire, United Kingdom. <sup>3</sup>Division of  
9 Biosciences, University College London, London, United Kingdom. <sup>4</sup>Institute of Zoology, Section Developmental  
10 Biology, Wormlab, University of Cologne, Köln, Germany. <sup>5</sup>National Research Council of Italy, Water Research  
11 Institute, Verbania Pallanza, Italy. <sup>6</sup>Community Dynamics Group, Department of Evolutionary Ecology, Max Planck  
12 Institute for Evolutionary Biology, Plön, Germany. <sup>7</sup>Aquatic Ecology and Evolution, University of Konstanz,  
13 Germany. <sup>8</sup>Josephine Bay Paul Center for Comparative Molecular Biology and Evolution, Marine Biological  
14 Laboratory, Woods Hole, MA

15  
16 \*Corresponding authors: RWN: reubennowell@gmail.com; TGB: tim.barraclough@zoo.ox.ac.uk

## 17 ORCID numbers:

18  
19  
20 RWN: 0000-0001-7546-6495

21 CGW: 0000-0001-7649-5255

22 PA: 0000-0001-6790-8687

23 PHS: 0000-0001-6776-0934

24 DF: 0000-0002-5770-0353

25 LB: 0000-0002-3885-5253

26 FR: 0000-0003-4044-8734

27 IRA: 0000-0002-4805-1339

28 TGB: 0000-0002-8084-2640

## 29 30 31 Abstract

32  
33 Transposable elements (TEs) are selfish genomic parasites whose ability to spread autonomously  
34 is facilitated by sexual reproduction in their hosts. If hosts become obligately asexual, TE  
35 frequencies and dynamics are predicted to change dramatically, but the long-term outcome is  
36 unclear. Here, we test current theory using whole-genome sequence data from eight species of  
37 bdelloid rotifers, a class of invertebrates where males are thus far unknown. Contrary to  
38 expectations, we find a diverse range of active TEs in bdelloid genomes, at an overall frequency  
39 within the range seen in sexual species. We find no evidence that TEs are spread by cryptic  
40 recombination or restrained by unusual DNA repair mechanisms, but we report that bdelloids  
41 share a large and unusual expansion of genes involved in RNAi-mediated TE suppression. This  
42 suggests that enhanced cellular defence mechanisms might mitigate the deleterious effects of  
43 active TEs and compensate for the consequences of long-term asexuality.

## 44 45 46 Introduction

47  
48 Transposable elements (TEs) are repeated sequences of DNA that can mobilize and replicate  
49 themselves within genomes [1–3]. TEs are divided into two major categories: class I  
50 retrotransposons, which use a ‘copy-and-paste’ replication mechanism via a reverse-transcribed  
51 RNA intermediate, and class II DNA transposons, which use ‘cut-and-paste’ replication with a  
52 DNA intermediate. Both classes are ancient and diverse—retrotransposons are found in some

53 bacteria and nearly all eukaryotes, while DNA transposons are found across the tree of life [4–6].  
54 Although TE replications are occasionally beneficial [7], the vast majority are deleterious for the  
55 host [8,9]. Costs include insertional mutations that disrupt genes [10], cellular costs of replicating  
56 and expressing excess DNA [11], and increased risk of chromosomal abnormalities due to  
57 ectopic recombination between homologous TE sequences interspersed through the genome  
58 [12,13]. Despite this, by replicating autonomously as selfish elements, TEs can accumulate to  
59 large numbers within genomes—for example, TEs comprise 46% of the human genome,  
60 including over 1 million (~11%) nonautonomous *Alu* retroelements [14,15]. TE numbers vary  
61 greatly, however, even between closely related species. In vertebrates, for example, TEs span an  
62 order of magnitude, from below 6% to over 50% of the genome [16], with similarly large  
63 variation observed within and between other groups such as arthropods [17], nematodes [18],  
64 and fungi [19]. Explaining this variation is vital to understanding the mechanisms affecting TE  
65 spread and control.

66  
67 Sexual reproduction has long been thought to play a major role in TE dynamics within  
68 eukaryotes. On the one hand, sexual reproduction and outcrossing decouples the fate of TEs from  
69 other host genes, allowing them to jump into new genomic backgrounds and to behave as selfish  
70 genomic parasites [1,2,20]. On the other hand, sex enables the efficient removal of deleterious  
71 insertions from populations through recombination and segregation [21–23]. The risk of  
72 chromosome abnormalities due to ectopic recombination, arguably the main cost of high TE  
73 loads in eukaryotes [9,24], also occurs during chromosome pairing at meiosis. Sex therefore  
74 plays opposing roles—it permits spread and selfish behaviour of TEs, and yet it facilitates and  
75 strengthens selection against high loads. Variation in TE content among taxa might thus result  
76 from shifts in the balance of these different opposing forces.

77  
78 By this logic, the loss of sexual reproduction should affect TE dynamics dramatically. Since  
79 asexual lineages generally arise from sexual species [25], it is likely that they initially harbor  
80 many active TEs [26,27]. All else being equal, the loss of recombination will limit the ability of  
81 selection to remove deleterious insertions from a fully linked host genome, and so the load of  
82 TEs should accumulate. At the same time, the fate of TEs is immediately coupled to that of the  
83 host genome, resulting in intensified selection for inactivation, excision or domestication of the  
84 elements [2,22,27–29]. The genomes of asexual lineages whose TEs continued to replicate  
85 unchecked would become overrun, potentially leading to extinction of the lineage and the TEs  
86 themselves. While some TEs could be maintained by horizontal transfer between species  
87 (especially class II DNA elements [6,30]) or by having beneficial effects (as in bacteria, [31,32]),  
88 other TEs—particularly the class I LINE-like (i.e. non-long terminal repeat [LTR])  
89 retrotransposons—are thought to be transmitted almost exclusively vertically [5,33,34], and  
90 therefore depend strongly on sex for their persistence.

91  
92 Models of the population genetics of vertically transmitted TEs in asexuals predict one of two  
93 outcomes: either TEs accumulate within lineages faster than they can be removed, overrunning  
94 each lineage in turn and driving the population extinct, or, conversely, TE removal outweighs  
95 proliferation and the population eventually purges itself entirely of deleterious TEs [27,35,36].  
96 These predictions are difficult to test empirically, however, because the time required for a  
97 population to arrive at either extinction or redemption is expected to be on the order of millions  
98 of generations [27], too long to observe directly and beyond the lifespan of most asexual lineages  
99 [37,38].

100

101 Here, we test these ideas in a well-known group of asexual animals, the bdelloid rotifers. These  
102 microscopic invertebrates appear to have reproduced without males or meiosis for tens of

103 millions of years, diversifying into hundreds of species within limno-terrestrial and freshwater  
104 habitats globally [39,40]. Bdelloids sampled from nature (and those reared in the laboratory)  
105 consist entirely of parthenogenetic females, and neither males nor hermaphrodites are described  
106 for any species despite centuries of close observation by naturalists [39,41,42]. Genetic and  
107 genomic evidence for their proposed ancient and obligate asexuality remains uncertain, however.  
108 Initial evidence of long-term asexuality [43,44] has been refuted by later studies or confounded  
109 by alternative explanations [45–47]. Some recent studies have proposed alternative modes of  
110 inter-individual genetic exchange, but these suggestions would require exotic mechanisms  
111 unknown in other animals [44,48], or rates of sex that are difficult to reconcile with the lack of  
112 observed males [49]. While the precise nature of reproduction in bdelloids remains an open  
113 question, nonetheless they provide a unique test-case for models of TE evolution when  
114 conventional sex is absent or strikingly rare.

115  
116 Initial PCR-based surveys of five bdelloid genomes found no evidence of class I  
117 retrotransposons from either the LTR or LINE-like superfamilies, but did reveal a diverse array  
118 of class II DNA transposons, mostly at low copy number [50]. The presence of class II TEs in  
119 bdelloids might be explained by horizontal transfer, which is thought to occur more frequently  
120 for class II TEs with DNA intermediates [6,30,33,34] (but see [51]). The apparent lack of  
121 retrotransposons contrasted sharply, however, with their near ubiquity in other taxa. At the time,  
122 the absence of class I TEs appeared consistent with the view that long-term asexual evolution in  
123 bdelloids had caused the loss of parasitic elements that depended on sexual transmission  
124 [22,27,50,52].

125  
126 Another unusual aspect of bdelloid physiology was suggested to contribute to their seemingly  
127 low TE complement. In most bdelloid species (but not all), individuals can survive complete  
128 desiccation at any life stage via a process called anhydrobiosis ('life without water'). Desiccation  
129 causes double-strand breakages (DSBs) in DNA, but bdelloids are able to repair these and  
130 recover to an unusual degree [53–55]. It was proposed that anhydrobiosis might influence TE  
131 evolution in two ways [27,52,56]. First, DSB repair could aid TE removal, either via gene  
132 conversion from a homologous chromosome lacking the TE insertion, or excision of mis-paired  
133 regions. Second, the pairing of homologous chromosomes, if required during DSB-repair, could  
134 provide a context for ongoing selection against chromosomal abnormalities caused by ectopic  
135 recombination. In either case, anhydrobiosis would decrease the number of TEs, potentially  
136 helping to explain the low overall TE content encoded in bdelloid genomes.

137  
138 These early ideas were transformed by more detailed studies of the model bdelloid species  
139 *Adineta vaga*, which used refined methods and genome-scale data to discover a variety of  
140 retrotransposon families. These include an endonuclease-deficient *Penelope*-like element (PLE)  
141 designated *Athena* [57,58], which is itself incorporated within much larger and highly unusual  
142 retroelements called *Terminons* [59]; another PLE that has retained its endonuclease [60], LTR  
143 retrotransposons (*Juno*, *Vesta*, *TelKA* and *Mag* [61,62]), and LINE-like retrotransposons (*R4*, *R9*,  
144 *Hebe*, *RTE*, *Tx1* and *Soliton* [44,63,64]). In total, TEs accounted for 2.2% of the 217 Mb genome  
145 (~4.8 Mb) [44], rising to ~4% on inclusion of the recently discovered giant *Terminon* elements  
146 [59]. The conclusion that bdelloids lack class I TEs therefore no longer holds, and the predicted  
147 effects of asexuality and anhydrobiosis on TE evolution remain open questions that are amenable  
148 to testing with comparative genomics. Specifically, the comparison of desiccating species with  
149 those few bdelloid rotifer lineages that are unable to survive desiccation would indicate whether  
150 anhydrobiosis does limit TE numbers as hypothesized. Also, comparisons within populations  
151 could shed light on the activity of TEs and whether bdelloids possess cryptic forms of  
152 recombination that could aid in TE removal or facilitate TE spread.

153  
154 Here, we test the predicted effects of asexuality and anhydrobiosis on TE evolution by  
155 comparing 42 rotifer genomes belonging to 15 taxonomic species. Our sample includes both  
156 desiccating and nondesiccating bdelloids, and eight monogonont rotifers [65–67], a separate  
157 class that alternates sexual and asexual reproduction and cannot survive desiccation as adults.  
158 Results are set in context by comparison to published genomes from an acanthocephalan [68]  
159 (now classified with rotifers in the Phylum Syndermata) and a range of other animal phyla. We  
160 ask six questions raised by theory. (1) How does the abundance and diversity of TEs in bdelloids  
161 differ from that in other animals, including sexual rotifers? (2) Are TEs recently and currently  
162 active in all bdelloids? (3) Can we detect signatures of recombination affecting bdelloid TEs, as  
163 might be expected if bdelloids do have cryptic forms of sexual reproduction? (4) Do desiccating  
164 species contain fewer TEs than nondesiccating species, as previously theorized? (5) Are TEs in  
165 bdelloids under the same selective constraints as in other taxa? (6) Finally, do bdelloids possess  
166 alternative molecular mechanisms that might help to keep their TEs under control, as might be  
167 expected if the ability to control TEs by sexual reproduction is absent or reduced?  
168

169

## 170 Results and Discussion

171

172 **High-quality population genomics data for bdelloid rotifers.** To quantify variation in repeat  
173 content within and between bdelloid species, we generated *de novo* whole-genome assemblies  
174 for 31 rotifer samples encompassing nine species (**Fig 1a**; **Table 1**; S1 Data). Three of these  
175 assemblies were generated using 10x Genomics linked-read data (for *Adineta steineri*, *Rotaria*  
176 *sordida*, and *Rotaria* sp. ‘Silwood-1’), while 26 are from single-individual samples. In order to  
177 capture as many potential repeats as possible, we generated two assemblies for each sample: a  
178 ‘reference’ assembly, with a focus on quality and contiguity, and a ‘maximum haplotype’  
179 (maxhap) assembly that included small or highly similar contigs that might be derived from  
180 recent TE duplications or other sources of copy number variation, at the expense of contiguity.  
181

182 Reference genomes showed an expected scaffold size (AU, see Materials and methods) ranging  
183 from 21.1 kb (*Didymodactylos carnosus*) to 702.3 kb (*R.* sp. ‘Silwood-1’) and BUSCO scores  
184 that indicated 89–98% of 303 core eukaryote genes were completely recovered, increasing to 96–  
185 99% if fragmented copies are included (**Table 1**). General genome characteristics such as  
186 genome size (assembly span), the proportion of G + C nucleotides (GC%), the number of coding  
187 genes (CDS), and the level of homologous divergence (number of SNPs identified within CDS)  
188 were within the range expected from previous analyses of bdelloid genomes [44,46] (**Fig 1b–c**;  
189 **Table 1**; S1 Fig). Intragenomic collinearity and synonymous divergence of coding regions in the  
190 *A. steineri*, *R. sordida* and *R.* sp. ‘Silwood-1’ maximum haplotype assemblies reveal the  
191 characteristic signature of degenerate tetraploidy that has been found in all bdelloid species  
192 examined to date (**Fig 1d**).  
193

194

195 Compared to the reference set, maxhap assemblies generally showed increased span (mean  
196 increase = 17.9 Mb ± 21.5 standard deviation [SD]) and were substantially more fragmented, as  
197 expected (S1 Table). Nonetheless, BUSCO completeness scores remained high, with 76% to  
198 98% of genes completely recovered (increasing to 95–98% if fragmented copies are included),  
199 indicating that the majority of core genes are successfully captured (S1 Table). The BUSCO  
200 duplication metric (‘D’) does not increase greatly between reference and maxhap assemblies,  
201 which shows that the additional sequences retained in the maxhap assemblies do not contain  
202 complete extra copies of core genes. Thus, the maxhap assemblies are not fully haplotype-  
resolved representations of the genome, except in the case of the three 10x assemblies.

**Table 1.** Assembly statistics for one monogonont and 30 bdelloid rotifer reference assemblies presented in this study.

| Sample ID  | Species name                                | SZ (Mb) | NN     | N50 (kb) | L50    | AU (kb) | GC (%) | Gaps (kb) | Coverage (X) | Genome BUSCO score       | CDS    | Proteome BUSCO score    | GenBank accession |
|------------|---------------------------------------------|---------|--------|----------|--------|---------|--------|-----------|--------------|--------------------------|--------|-------------------------|-------------------|
| Bc_PSC1    | <i>Brachionus calyciflorus</i> (Monogonont) | 116.7   | 14,869 | 18.5     | 1,692  | 26.6    | 25.6   | 78        | 186          | C:96%[S:93%,D:3%],F:2%   | 24,404 | C:98%[S:93%,D:5%],F:1%  | GCA_904009505.1   |
| Ar_ARIC003 | <i>Adineta ricciae</i>                      | 135.6   | 4,302  | 283.8    | 129    | 388     | 35.5   | 65        | 89           | C:97%[S:58%,D:39%],F:2%  | 49,015 | C:97%[S:52%,D:45%],F:1% | GCA_904047305.1   |
| As_10x_p   | <i>Adineta steineri</i>                     | 171.1   | 8,257  | 200.1    | 163    | 394.5   | 29     | 206       | 198          | C:95%[S:67%,D:33%],F:2%  | 50,321 | C:97%[S:58%,D:38%],F:2% |                   |
| As_ASTE804 | <i>Adineta steineri</i>                     | 160.3   | 9,359  | 158.1    | 265    | 214.9   | 29.1   | 152       | 62           | C:95%[S:74%,D:22%],F:2%  | 47,222 | C:98%[S:74%,D:24%],F:2% | GCA_904047245.1   |
| As_ASTE805 | <i>Adineta steineri</i>                     | 156.3   | 9,008  | 169.6    | 245    | 226.4   | 29.2   | 129       | 65           | C:98%[S:77%,D:21%],F:1%  | 43,986 | C:99%[S:72%,D:26%],F:1% | GCA_904047255.1   |
| As_ASTE806 | <i>Adineta steineri</i>                     | 160.3   | 7,597  | 168.2    | 257    | 222.5   | 29.2   | 145       | 82           | C:96%[S:72%,D:24%],F:2%  | 45,930 | C:98%[S:74%,D:24%],F:2% | GCA_904047275.1   |
| Dc_DCAR505 | <i>Didymodactylos carnosus</i>              | 323.6   | 87,048 | 7.8      | 11,656 | 10.5    | 33.5   | 41        | 21           | C:86%[S:69%,D:17%],F:8%  | 46,286 | C:88%[S:71%,D:18%],F:9% | GCA_904047325.1   |
| Dc_DCAR706 | <i>Didymodactylos carnosus</i>              | 368.8   | 78,356 | 12       | 7,695  | 19.1    | 33.5   | 13        | 76           | C:95%[S:70%,D:25%],F:2%  | 46,863 | C:95%[S:71%,D:25%],F:2% | GCA_904053135.1   |
| Rd_10x_p   | <i>Rotaria sordida</i>                      | 272.5   | 16,571 | 64.5     | 843    | 193.8   | 30.8   | 395       | 91           | C:94%[S:77%,D:19%],F:2%  | 44,299 | C:95%[S:69%,D:26%],F:2% |                   |
| Rd_RSOR408 | <i>Rotaria sordida</i>                      | 252.9   | 20,315 | 57.6     | 1,246  | 75.5    | 30.4   | 291       | 39           | C:94%[S:76%,D:19%],F:3%  | 40,501 | C:97%[S:73%,D:24%],F:2% | GCA_904053145.1   |
| Rd_RSOR410 | <i>Rotaria sordida</i>                      | 252.6   | 19,518 | 60.9     | 1,179  | 80      | 30.4   | 252       | 42           | C:95%[S:77%,D:18%],F:3%  | 40,474 | C:98%[S:74%,D:24%],F:2% | GCA_904053495.1   |
| Rd_RSOR504 | <i>Rotaria sordida</i>                      | 251.3   | 22,067 | 53.1     | 1,338  | 69.8    | 30.4   | 369       | 39           | C:94%[S:78%,D:16%],F:3%  | 41,085 | C:96%[S:73%,D:23%],F:3% | GCA_904047315.1   |
| Rg_MAG1    | <i>Rotaria magnacalcarata</i>               | 178.7   | 19,184 | 42       | 1,077  | 62.4    | 32     | 402       | 58           | C:97%[S:81%,D:16%],F:1%  | 40,318 | C:99%[S:76%,D:22%],F:1% | GCA_903995865.1   |
| Rg_MAG2    | <i>Rotaria magnacalcarata</i>               | 181.1   | 22,216 | 39.7     | 1,141  | 61      | 32     | 433       | 63           | C:98%[S:81%,D:17%],F:1%  | 40,289 | C:99%[S:74%,D:26%],F:0% | GCA_903995855.1   |
| Rg_MAG3    | <i>Rotaria magnacalcarata</i>               | 180.9   | 22,132 | 40.7     | 1,142  | 60      | 32     | 508       | 60           | C:96%[S:80%,D:17%],F:1%  | 40,740 | C:99%[S:77%,D:22%],F:0% | GCA_903995845.1   |
| Rg_RM15    | <i>Rotaria magnacalcarata</i>               | 174     | 18,391 | 46.5     | 966    | 67.3    | 32     | 430       | 55           | C:96%[S:80%,D:16%],F:2%  | 38,283 | C:99%[S:77%,D:22%],F:1% | GCA_903995885.1   |
| Rg_RM9     | <i>Rotaria magnacalcarata</i>               | 173.8   | 19,520 | 44       | 999    | 64.7    | 31.9   | 594       | 51           | C:96%[S:80%,D:16%],F:1%  | 38,404 | C:98%[S:76%,D:22%],F:1% | GCA_903995825.1   |
| Rp_RPSE411 | <i>Rotaria</i> sp. 'Silwood-2'              | 296.5   | 30,050 | 102.5    | 381    | 691.1   | 31     | 247       | 35           | C:93%[,S:72%,D:21%],F:4% | 48,378 | C:95%[S:72%,D:23%],F:4% | GCA_904053095.1   |
| Rp_RPSE503 | <i>Rotaria</i> sp. 'Silwood-2'              | 285.6   | 33,174 | 78.3     | 449    | 627.2   | 31.3   | 446       | 34           | C:91%[,S:75%,D:17%],F:5% | 48,269 | C:92%[S:72%,D:20%],F:7% | GCA_904053125.1   |
| Rp_RPSE809 | <i>Rotaria</i> sp. 'Silwood-2'              | 271.1   | 28,589 | 101.6    | 350    | 681.4   | 31     | 377       | 27           | C:93%[,S:76%,D:17%],F:4% | 47,010 | C:95%[S:74%,D:22%],F:4% | GCA_904053085.1   |
| Rp_RPSE812 | <i>Rotaria</i> sp. 'Silwood-2'              | 264.1   | 34,498 | 80.8     | 403    | 616.2   | 31.1   | 428       | 27           | C:89%[,S:74%,D:15%],F:8% | 47,040 | C:90%[S:73%,D:17%],F:8% | GCA_904053105.1   |
| Rs_AK11    | <i>Rotaria socialis</i>                     | 149.2   | 6,303  | 111.3    | 370    | 150.2   | 31.8   | 442       | 39           | C:97%[,S:80%,D:17%],F:1% | 34,844 | C:99%[S:75%,D:24%],F:1% | GCA_903995835.1   |
| Rs_AK15    | <i>Rotaria socialis</i>                     | 147.4   | 5,030  | 134.7    | 305    | 177.6   | 31.8   | 423       | 37           | C:96%[,S:79%,D:18%],F:1% | 34,140 | C:98%[S:76%,D:23%],F:1% | GCA_903995795.1   |
| Rs_AK16    | <i>Rotaria socialis</i>                     | 147.4   | 4,720  | 139.5    | 296    | 180.3   | 31.8   | 332       | 43           | C:97%[,S:80%,D:18%],F:0% | 33,717 | C:99%[S:76%,D:23%],F:1% | GCA_903995805.1   |
| Rs_AK27    | <i>Rotaria socialis</i>                     | 149.9   | 5,952  | 123.7    | 343    | 159.8   | 31.8   | 458       | 36           | C:97%[,S:80%,D:17%],F:0% | 34,369 | C:99%[S:75%,D:24%],F:1% | GCA_903995815.1   |
| Rs_RS1     | <i>Rotaria socialis</i>                     | 151.1   | 6,254  | 124.9    | 334    | 166.2   | 31.8   | 490       | 40           | C:97%[,S:80%,D:17%],F:0% | 33,937 | C:99%[S:77%,D:22%],F:1% | GCA_903995875.1   |

|                   |                                   |       |        |       |     |       |      |     |    |                          |        |                         |                 |
|-------------------|-----------------------------------|-------|--------|-------|-----|-------|------|-----|----|--------------------------|--------|-------------------------|-----------------|
| <b>Rw_10x_p</b>   | <i>Rotaria</i> sp.<br>'Silwood-1' | 310.4 | 16,995 | 211.8 | 211 | 126.2 | 31.1 | 534 | 53 | C:95%,[S:76%,D:20%],F:1% | 44,241 | C:97%[S:73%,D:24%],F:1% |                 |
| <b>Rw_RSIL801</b> | <i>Rotaria</i> sp.<br>'Silwood-1' | 268.4 | 28,548 | 136.5 | 288 | 687.3 | 30.8 | 472 | 45 | C:94%,[S:77%,D:17%],F:4% | 41,574 | C:95%[S:75%,D:21%],F:5% | GCA_904053155.1 |
| <b>Rw_RSIL802</b> | <i>Rotaria</i> sp.<br>'Silwood-1' | 249.9 | 21,286 | 153.4 | 238 | 702.3 | 30.7 | 451 | 42 | C:92%,[S:76%,D:16%],F:4% | 39,577 | C:94%[S:76%,D:18%],F:4% | GCA_904053505.1 |
| <b>Rw_RSIL804</b> | <i>Rotaria</i> sp.<br>'Silwood-1' | 247.6 | 25,643 | 118.3 | 287 | 660.4 | 30.8 | 667 | 34 | C:94%,[S:78%,D:16%],F:3% | 41,139 | C:96%[S:78%,D:19%],F:3% | GCA_904053115.1 |
| <b>Rw_RSIL806</b> | <i>Rotaria</i> sp.<br>'Silwood-1' | 294.1 | 29,968 | 132.4 | 333 | 681.9 | 30.8 | 500 | 31 | C:95%,[S:79%,D:16%],F:2% | 48,259 | C:97%[S:78%,D:19%],F:2% | GCA_904054495.1 |

205  
206  
207  
208  
209

Sequence statistics codes: **SZ**, total sequence length (Mb); **NN**, number of sequences; **N50**, N50 scaffold length (kb); **L50**, N50 index; **AU**, expected scaffold size (area under 'Nx' curve, kb).

Gaps: Undetermined bases (Ns) introduced during scaffolding.

BUSCO score based on eukaryote set ( $n = 303$ ); BUSCO codes: **C**, complete; **S**, complete and single copy; **D**, complete and duplicated; **F**, fragmented.

Abbreviations: GC, guanine + cytosine; BUSCO, Benchmarking Universal Single-Copy Orthologs.



210 To these new data, we added published genomes for seven monogonont taxa (one from the  
 211 *Brachionus calyciflorus* species complex [65] and six from four species of the *Brachionus*  
 212 *plicatilis* species complex, namely *B. asplanchnoidis*, *B. plicatilis* sensu stricto (HYR1), *B.*  
 213 *rotundiformis*, and *B. sp. 'Tiscar'* [66,67]) and four bdelloids (*A. vaga*, *Adineta ricciae*, *Rotaria*  
 214 *magnacalcarata* and *Rotaria macrura* [44,46]), yielding a total of 42 rotifer genomes. Of these,  
 215 11 samples belong to nondesiccating bdelloid species (five individuals each from *R.*  
 216 *magnacalcarata* and *Rotaria socialis*, and the previously published genome of *R. macrura*).  
 217  
 218

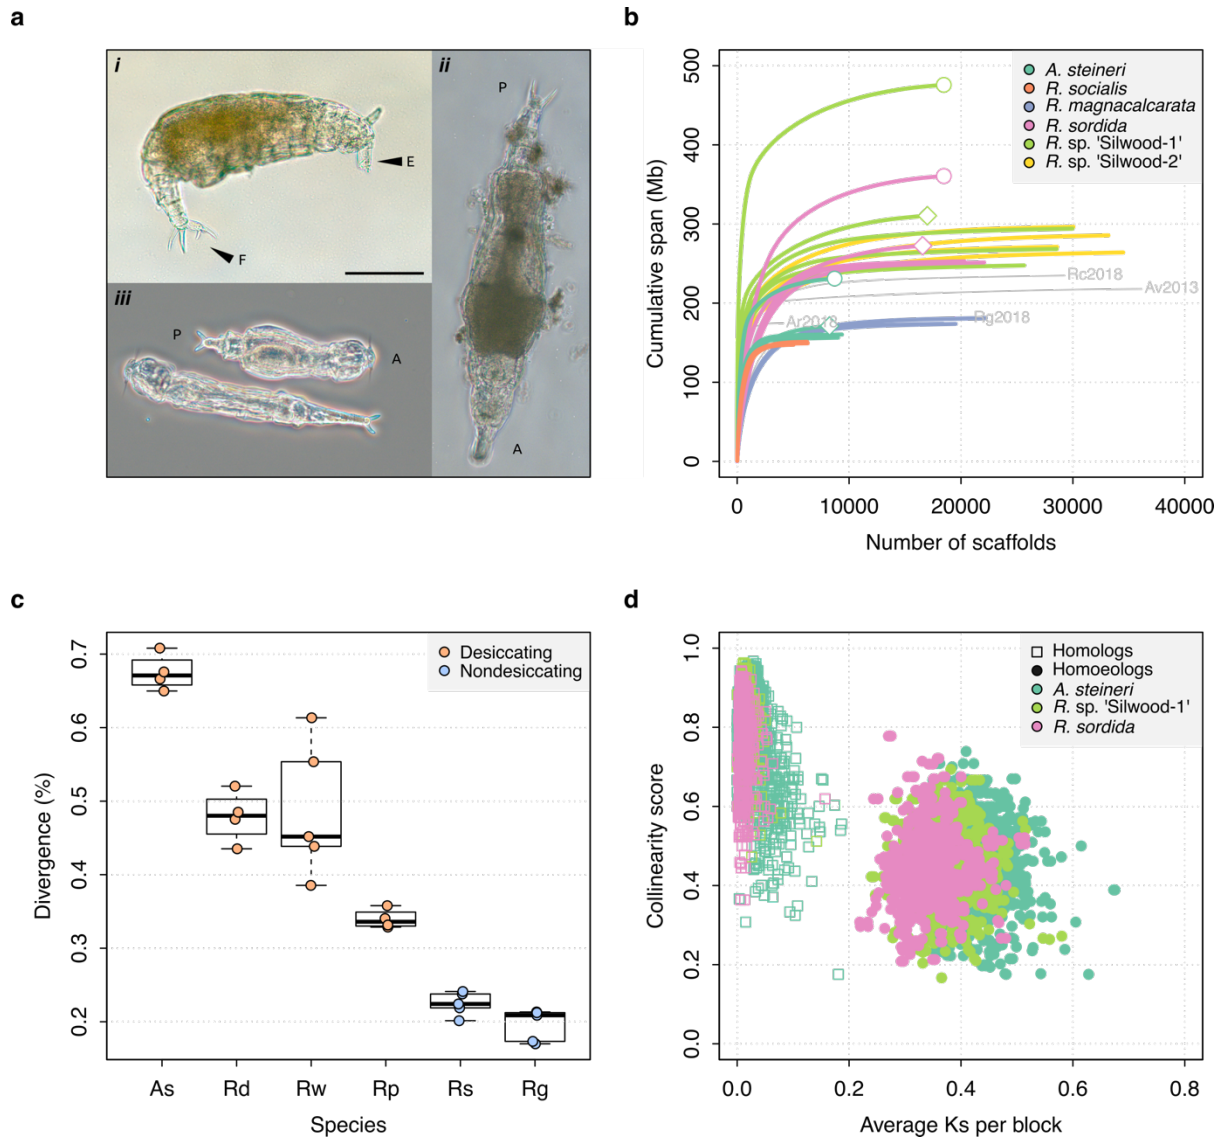

219  
 220  
 221 **Fig 1. Genome properties of sequenced rotifers.** (a) Bdelloid rotifer morphology; scale bar indicates  
 222 100  $\mu$ m. (i) Individual from an undescribed species of *Rotaria* (*R. sp. 'Silwood-1'*), showing eyes (E) and  
 223 foot (F) with two spurs and three toes. (ii) Further image of *R. sp. 'Silwood-1'* with anterior–posterior (A–P)  
 224 axis marked. (iii) Two individuals of *A. steineri* in phase contrast. (b) Cumulative assembly span for six  
 225 bdelloid species with population genomics data ( $n > 2$ ). 10x Genomics haploid ('pseudohap') and diploid  
 226 ('megabubbles') assemblies for *A. steineri*, *R. sordida* and *R. sp. 'Silwood-1'* are indicated with diamond  
 227 and circle symbols, respectively. The four previously published genomes for *A. vaga* ('Av2013', GenBank  
 228 accession GCA\_000513175.1) and *A. ricciae* ('Ar2018', GCA\_900240375.1), *R. macrura* ('Rc2018',  
 229 GCA\_900239685.1) and *R. magnacalcarata* ('Rg2018', GCA\_900239745.1) are indicated in grey, for  
 230 comparison. (c) Intragenomic divergence, measured as the number of SNPs detected in coding regions  
 231 (CDS). Boxplots show the median (band), interquartile range (box) and minimum/maximum values

232 (whiskers). Underlying data are shown as jittered points. Desiccation-tolerant species are in orange,  
233 intolerant species in blue. Species abbreviations: **As**, *A. steineri*; **Rd**, *R. sordida*; **Rw**, *R. sp.* 'Silwood-1';  
234 **Rp**, *Rotaria sp.* 'Silwood-2'; **Rg**, *R. magnacalcarata*; **Rs**, *R. socialis*. **(d)** Genome structure in *A. steineri*,  
235 *R. sordida* and *R. sp.* 'Silwood-1' haplotype-resolved ('megabubbles') assemblies. Each point represents  
236 a collinear block of genes, plotted by average pairwise synonymous ( $K_s$ , X-axis) and collinearity score  
237 (see Materials and methods and S1 note) on the Y-axis. Separation into two distinct clusters representing  
238 homologous (squares) and homoeologous (circles) relationships among gene copies is consistent with  
239 ancestral tetraploidy, with homoeologous copies derived from a putative ancient genome duplication.

240  
241  
242 **Abundant and diverse TEs in bdelloid genomes.** To ascertain the repeat content of bdelloid  
243 genomes relative to other taxa in a consistent manner, we used the RepeatModeler and  
244 RepeatMasker pipelines to identify and classify repeats across genomes. The total proportion of  
245 the genome classified as repetitive ranged from ~19% to 45% across bdelloid genera, with  
246 variation within and between species (**Fig 2a**; S2 Fig; S3 Fig; S2 Data; S3 Data). Most of these  
247 are simple or unclassified repeats that do not belong to major TE superfamilies. While the  
248 precise nature of these unclassified repeats is not elucidated, an appreciable fraction (~7–27%,  
249 mean = 17%) are also annotated as protein-coding and thus may be derived from gene  
250 expansions or other duplications, while a further small fraction (< 1%) are accounted for by an  
251 additional survey of small, nonautonomous class II TEs called miniature inverted-repeats  
252 (MITEs) (S2 Data). The proportion of the genome accounted for by known TEs was much  
253 smaller, ranging from 2.4% to 7.3% (mean =  $4.9\% \pm 1.2$  standard deviations [SD], median =  
254 5.1%) in bdelloids. Broken down by class and superfamily, the mean values are: class I total =  
255  $2.09\% \pm 0.75$  (PLEs =  $0.59\% \pm 0.14$ ; LTRs =  $0.68\% \pm 0.26$ ; and LINEs =  $0.82\% \pm 0.47$ ); class II  
256 total =  $2.79 \pm 0.8$  (DNA transposons =  $2.49\% \pm 0.77$ ; rolling circles =  $0.30 \pm 0.11$ ). These results  
257 are in broad agreement with previous estimates of TE content in bdelloids [44,46,47,59].

258  
259 We first compare these values to closely related sexual lineages in the phylum Syndermata, the  
260 monogonont rotifers and acanthocephalans. The most striking difference relates to the recently  
261 published genome of the obligately sexual acanthocephalan *Pomphorhynchus laevis* [68], which  
262 encodes a substantially greater proportion of repeats than either bdelloids or monogononts. In  
263 agreement with Mauer et al., we find ~66% of the *P. laevis* genome to be composed of repeats.  
264 The large majority are class I retrotransposons (~71% of the total TE content) from the LINE  
265 (~52%) and PLE (~15%) superfamilies, and there are relatively few DNA transposons (~1.3%)  
266 (**Fig 2b**). There is increasing evidence that acanthocephalans may be the closest relatives to the  
267 Class Bdelloidea [69–71]. However, all members of the Acanthocephala (also known as the  
268 thorny-headed worms) are obligate endoparasites and are highly differentiated in both  
269 morphological and molecular terms from other syndermatans. It is unclear whether these features  
270 may contribute to the high repeat content and other unusual genome characteristics of *P. laevis*  
271 [68].

272  
273 In monogononts, the mean values for class I TEs is  $5.2\% \pm 1.5$  SD and for class II TEs it is  $2.5\%$   
274  $\pm 1.0$  SD. Thus, monogononts are slightly more TE-rich than bdelloids, but also substantially  
275 more variable between species (**Fig 2a**; S3 Fig). Repeat content differs between bdelloids and  
276 monogononts in two main ways, both in regard to the composition of class I retrotransposons.  
277 First, monogononts encode substantially more LINE-like retroelements than bdelloids, making  
278 up (on average) approximately 50% and 16% of the total TE content in each clade respectively.  
279 The frequency of LINEs is of particular interest, because this class of TEs is thought to be least  
280 likely to undergo horizontal transfer and thus the most dependent on sex for transmission  
281 [5,33,34]. Second, *Penelope*-like elements (PLEs) have increased in proportion in all bdelloids  
282 relative to monogononts, from ~1% in monogononts to ~12% in bdelloids on average.



283 Interestingly, a high proportion of PLEs is also seen in the acanthocephalan *P. laevis*, while a  
284 high proportion of LINEs is found in both *D. carnosus* isolates (~35% of total TE content), a  
285 deeply branching lineage sister to all other bdelloid taxa included in the analyses. Thus,  
286 assuming that acanthocephalans are the closest relatives to bdelloids, the most parsimonious  
287 explanation for these broad-scale patterns is that the expansion of PLEs occurred in the ancestor  
288 to bdelloids and acanthocephalans, whereas the contraction of LINEs has occurred more  
289 recently, confined to a subset of bdelloid genera.

290  
291 To put these differences in TE content among rotifers in a broader context, we applied the same  
292 repeat-finding pipeline to animals from a range of more distantly related protostome phyla: three  
293 insects, a nematode, two tardigrades, five molluscs, two annelids, a brachiopod, platyhelminth  
294 and orthonectid [72–83] (S2 Table). As expected, both the abundance and diversity of TEs varied  
295 widely across taxa (**Fig 2b**). Total TE content ranged from 0.8% (the insect *Polypedilum*  
296 *vanderplanki*) to ~24% (octopus and platyhelminth). Although the acanthocephalan genome  
297 appears to be particularly rich in TEs, bdelloids (except for *D. carnosus*) have modest amounts  
298 of TEs, including class I TEs specifically, while in monogononts these amounts vary greatly  
299 among species. All bdelloids encode relatively more TEs than both *Polypedilum* species but  
300 fewer than *Drosophila melanogaster*, *Caenorhabditis elegans*, annelid worms and some  
301 molluscs, and are intermediate with respect to other taxa. Note that TE proportion in molluscs,  
302 nematodes and flatworms is known to be highly variable (e.g. [18]), while bdelloids display  
303 much less variability barring the early-branching *D. carnosus*.

304  
305

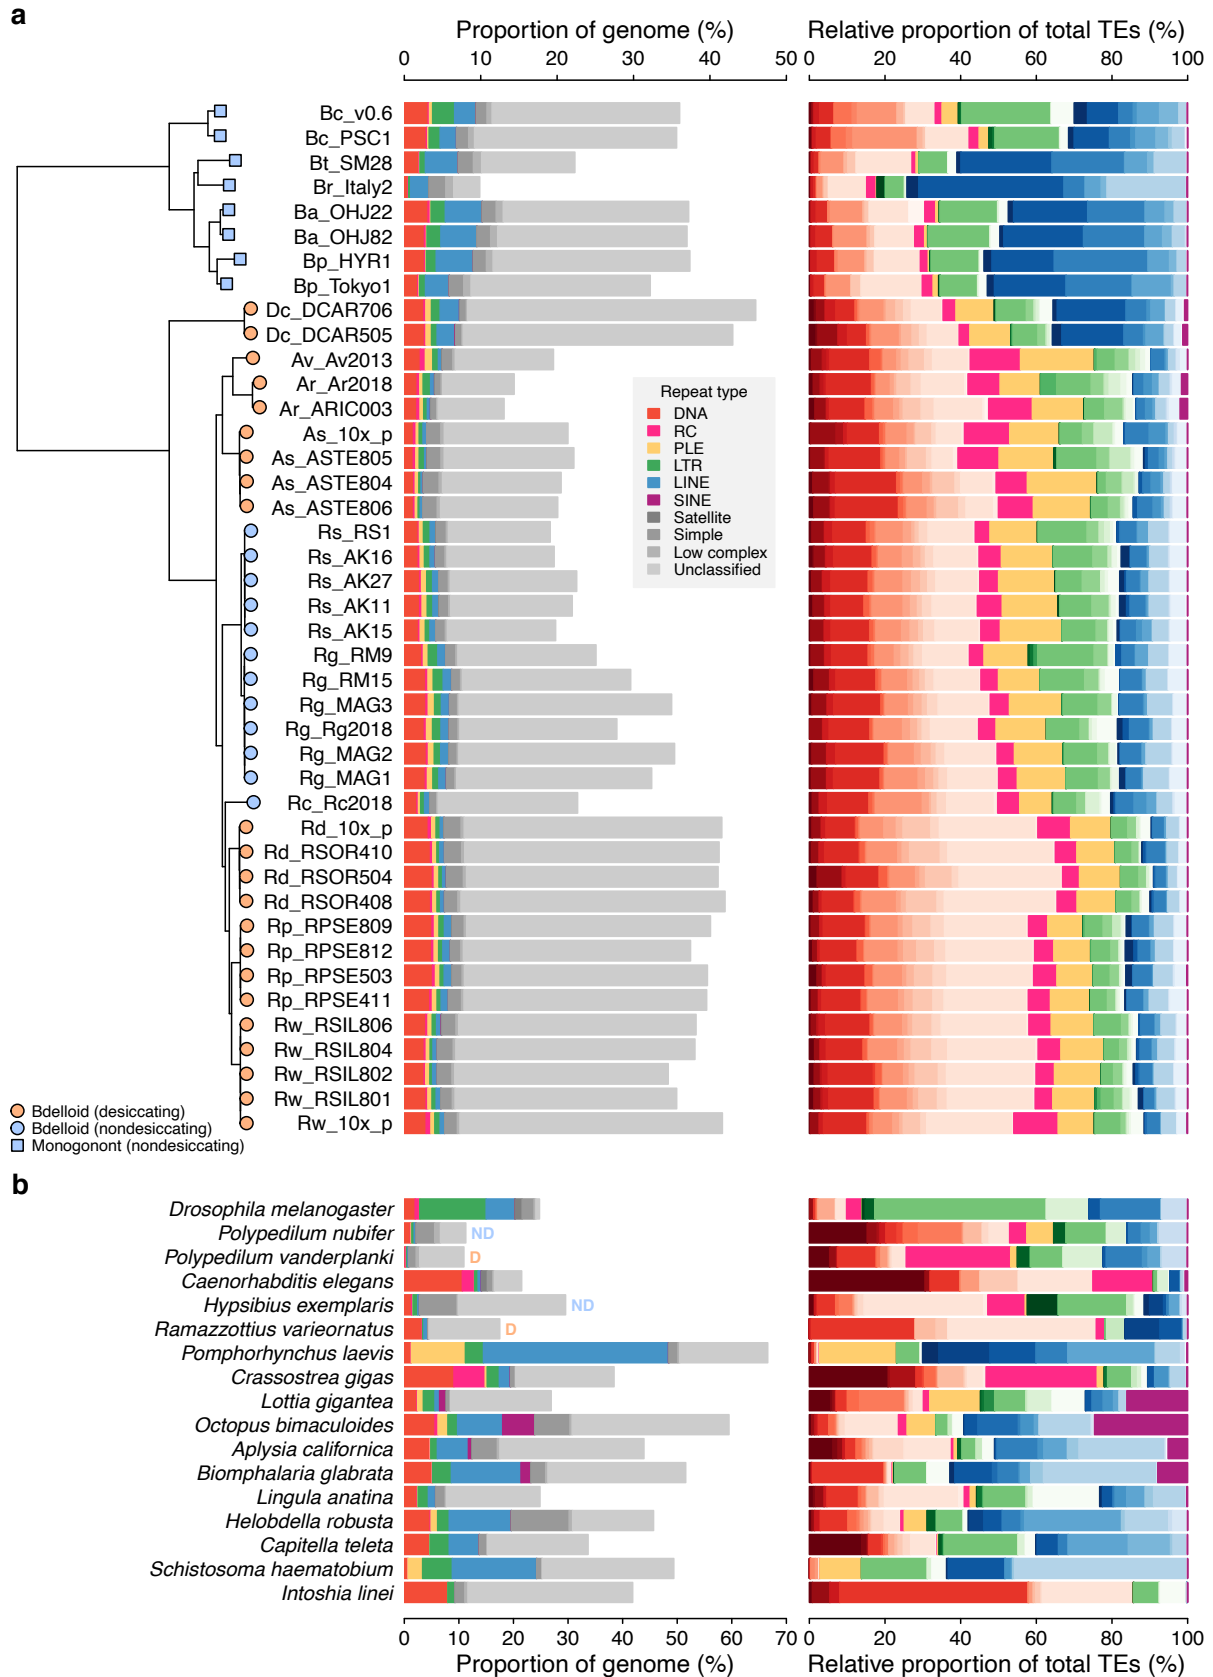

306  
307  
308  
309  
310  
311

**Fig 2. Repeat content and diversity in rotifer genomes.** (a) Maximum likelihood phylogeny of eight monogonont (square symbols on tips) and 34 bdelloid (circles) genomes based on the concatenated alignment of a subset of core eukaryotic (BUSCO) genes. Orange and blue tip colours indicate desiccating and nondesiccating taxa, respectively. Species codes in tip names are: **Bc**, *Brachionus*

312 *calyciflorus*; **Br**, *B. rotundiformis*; **Bt**, *B. sp.* 'Tiscar'; **Bp**, *B. plicatilis* HYR1; **Ba**, *B. asplanchnoidis*; **Dc**,  
313 *Didymodactylos carnosus*; **Av**, *Adineta vaga*; **Ar**, *A. ricciae*; **As**, *A. steineri*; **Rs**, *Rotaria socialis*; **Rg**, *R.*  
314 *magnacalcarata*; **Rc**, *R. macrura*; **Rd**, *R. sordida*; **Rw**, *R. sp.* 'Silwood-1'; **Rp**, *R. sp.* 'Silwood-2'. Repeat  
315 content is shown as the genome proportion (%) broken down by TE superfamily (middle panel), and  
316 relative proportion (%) of total known (i.e., classified) TEs (right panel), where colours represent TE  
317 superfamilies (see legend) and shades of colour represent different TE families within each superfamily.  
318 **(b)** Equivalent repeat content analysis in 17 protostome animal genomes, including the model species *D.*  
319 *melanogaster* and *C. elegans*, the recently published acanthocephalan rotifer *P. laevis*, and selected  
320 other species from across the protostome group. Two further examples of desiccating (orange 'D') and  
321 nondesiccating (blue 'ND') species pairs are shown: the insects *P. nubifer* and *P. vanderplanki* and the  
322 tardigrades *H. exemplanis* and *R. varieornatus*.

323  
324  
325 These results show that bdelloid species encode an abundant diversity of both class I and II TEs,  
326 and, set against the repeat content of other rotifers and animals, do not appear particularly  
327 deficient or unusual with regard to the proportion of nucleotides encoding transposable elements.  
328 Although the bdelloids do have lower frequencies of class I TEs (~16% of total TE content) than  
329 the monogononts (~50%) or the acanthocephalan (~52%), as predicted by theory for elements  
330 dependent on vertical transmission, they still possess them in numbers that are comparable to  
331 sexual organisms (e.g. *C. elegans*). Furthermore, the basally divergent bdelloid *D. carnosus* did  
332 not show the same magnitude of decrease in LINEs (~35%), indicating that different dynamics  
333 may be at play in different lineages. Thus, it is clear that the most simplistic expectations of TE  
334 evolution under the hypothesis of long-term asexuality (i.e., either runaway proliferation or  
335 complete elimination) are not met, necessitating an evaluation of possible explanations that may  
336 align theory with observation.

337  
338 **TE transposition is recent and ongoing.** One possible explanation is that TEs in bdelloid  
339 genomes do not replicate autonomously or are otherwise inactivated or 'fossilised' within their  
340 host genome. To investigate this, we first generated divergence 'landscapes' for identified TE  
341 copies within each genome, using the de novo RepeatMasker results. TE landscapes measure the  
342 amount of sequence divergence between each TE copy and a consensus derived from all copies  
343 in its family [84]. Histograms of the resulting Kimura distances (*K*-values [85]) provide insights  
344 into the evolutionary history of TE activity [16,86,87].

345  
346 TE landscapes for the three diploid (10x Genomics) assemblies of *A. steineri*, *R. sp.* 'Silwood-1'  
347 and *R. sordida* show that TE divergence is bimodal but strongly zero-inflated (**Fig 3**). A large  
348 number of TE copies have very low or no divergence from the consensus (*K*-value  $\leq 1\%$ ).  
349 Assuming a molecular clock for nucleotide substitutions within duplicated TEs, such elements  
350 represent recent duplications that are highly similar to their progenitor copy, consistent with  
351 recent transposition of an active element. In proportion, most of these belong to class II DNA  
352 transposon superfamilies (in red), but the spike of zero divergence is also present for class I  
353 retrotransposons (in blue and green). An older, broader mode is seen around a *K*-value of 20–  
354 30% that probably reflects historical TE transpositions and/or a signal from the tetraploid  
355 genome structure present in all bdelloids sequenced to date. The same pattern was observed in  
356 the haplotype-resolved assemblies of *A. vaga* [44] and *A. ricciae* [46] (**Fig 3b**; S4 Fig), and was  
357 generally present but less pronounced in the other 'maxhap' assemblies depending on the repeat  
358 pipeline applied (S4 Fig; S5 Fig).

359  
360

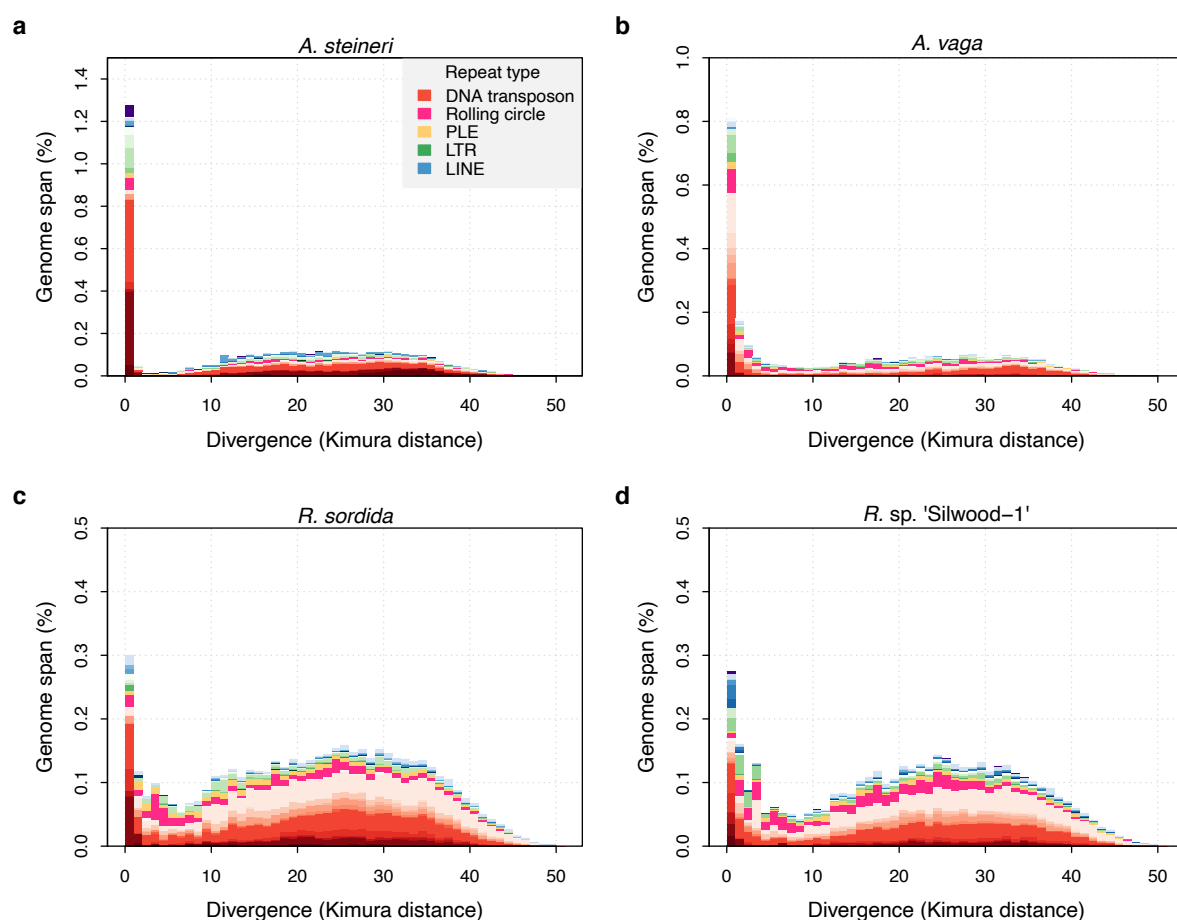

361  
362  
363 **Fig 3. TE divergence landscapes for selected genomes.** The X-axes show the level of divergence  
364 (Kimura substitution level, CpG adjusted) between each identified TE copy and the consensus sequence  
365 for that TE family (the inferred ancestral copy). Thus, if newly arising TE copies evolve neutrally, the  
366 amount of divergence is a proxy for the time since its duplication, with older copies accumulating more  
367 substitutions and appearing further to the right. The Y-axis shows the proportion of the genome occupied  
368 by each bin. Colours represent TE superfamilies (see legend) and shades of colour represent different TE  
369 families within each superfamily. Data are shown for the 10x Genomics diploid ('megabubbles')  
370 assemblies of *A. steineri*, *R. sp. 'Silwood-1'* and *R. sordida* compared to the published genome of *A.*  
371 *vaga*. Note different scales on some Y-axes.

372  
373  
374 To evaluate recent TE activity further, we developed a simple method to identify insertion sites  
375 for LTR retrotransposons (LTR-Rs) and assess their presence or absence in related individuals.  
376 Because most LTR-Rs insert into random genome locations [5,8], the neighbouring genome  
377 sequence provides a unique marker for a given insertion event [88]. We constructed a library of  
378 such insertion markers ('LTR-tags') for all 'full-length' LTR-Rs (i.e. those with long-terminal  
379 repeats present at both the 5' and 3' ends of the element) detected in our genomes, and then  
380 searched for their presence or absence in the other samples. For a given LTR-tag identified in  
381 genome *A*, the presence of a contiguous alignment in genome *B* indicates that the same insertion  
382 is shared between *A* and *B*.

383  
384 For a set of 161 high-confidence and non-redundant LTR-Rs identified in the single-individual  
385 samples, alignment contiguity for each LTR-tag versus each of the other genomes was scored  
386 using a read-mapping approach (see Materials and methods), resulting in a pairwise matrix of  
387 presence/absence scores (Fig 4a; S4 Data). High scores for LTR insertion-site presence

388 correlated strongly with the phylogeny, resulting in an average score of ~0.9 within species  
 389 compared to < 0.1 between species and a clear visual signal along the diagonal of Fig 4a. Very  
 390 few LTR insertion sites were shared between bdelloid species. While some absences could  
 391 reflect loss rather than gain, the restriction of nearly all LTR insertion sites to single species  
 392 indicates that they have been gained during the separate evolutionary history of that species.  
 393

394 LTR-R insertions also vary between individuals within the same species, indicating recent  
 395 transposition events and the potential for ongoing fitness consequences for the host. One case-  
 396 study is illustrated for *R. magnacalcarata* (Fig 4b; S6 Fig). The individuals RM9 and RM15  
 397 share an LTR-R insertion that is not present in conspecifics. Aligning the regions of the genome  
 398 assemblies containing these LTR-tags indicates that an 8.1 kb LTR-R has inserted into a protein-  
 399 coding sequence in the lineage leading to RM9 and RM15. It has introduced a premature stop  
 400 codon to a gene that encodes a protein (7,479 residues) of unknown function but with partial  
 401 similarity to midasin, an ATPase essential to ribosome biosynthesis in several model eukaryotes  
 402 [89,90]. In RM9 and RM15, the predicted product is substantially truncated (to 6,025 residues)  
 403 by the element insertion. Despite the potential fitness consequences, RM9 and RM15 have  
 404 evidently persisted for some time since, because they differ at approximately 0.5% of single-  
 405 nucleotide sites across the 8.1 kb LTR element itself. A possible explanation is that both the  
 406 RM9 and RM15 assemblies also contain a scaffold with an empty insertion site, indicating an  
 407 intact version of the coding sequence spanned by the LTR insertion (represented in Fig. 4b by  
 408 the partial matches on scaffolds 16719 and 07127, respectively). If the insertion is hemizygous,  
 409 an uninterrupted homologous copy of the affected gene might mask or reduce the effect of the  
 410 mutation. Given the degenerate tetraploid structure of bdelloid genomes, further homoeologous  
 411 copies (i.e. derived from whole-genome duplication) might provide additional functional  
 412 redundancy and help perform critical functions of interrupted genes.  
 413  
 414

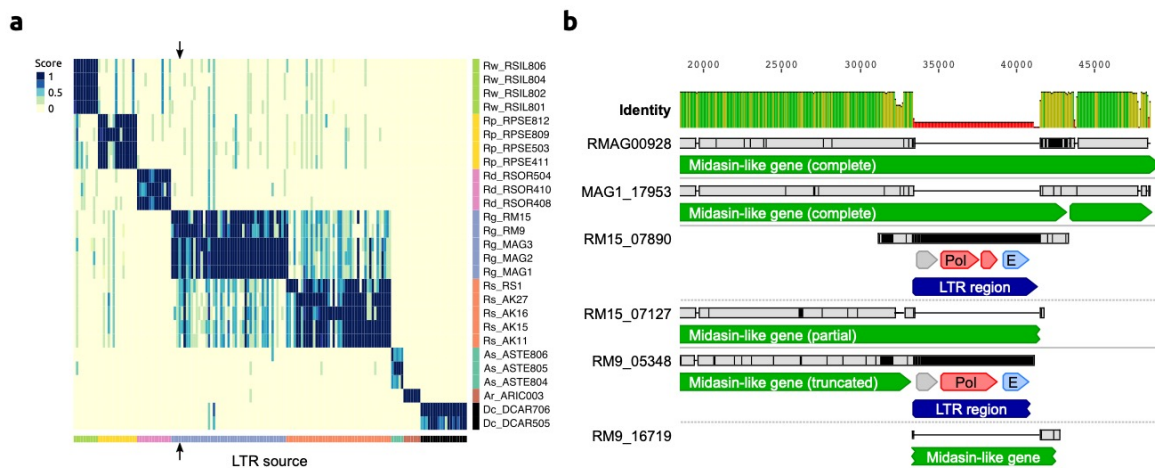

415  
 416  
 417 **Fig 4. LTR insertion-site polymorphism in bdelloid species.** (a) Columns represent 161 LTR-Rs  
 418 identified across bdelloid samples, arranged by genome of origin (see colours at bottom and side).  
 419 Support for the presence of a given LTR-R at a specific insertion site in each genome is scored from 0  
 420 (absent, yellow) to 1 (present, dark blue), where a score < 0.5 is strong evidence for absence (see  
 421 Materials and methods for details). Arrows demark the location of the LTR-R example shown in b. (b)  
 422 Nucleotide alignment of region around an LTR-R insertion (blue) identified in RM9 (scaffold 05348) and  
 423 RM15 (scaffold 07890), alongside their putative homologous scaffolds (scaffolds 16719 and 07127  
 424 respectively) that do not show the insertion. Scaffolds from Rg2018 (RMAG00928) and MAG1 are also  
 425 shown for comparison. Predicted CDS with similarity to Pol and Env proteins are shown in red and light  
 426 blue. The LTR-R is most likely a member of the *TelKA* family, based on sequence similarity.



427  
428  
429  
430  
431  
432  
433  
434  
435  
436  
437  
438  
439  
440  
441  
442  
443  
444  
445  
446  
447  
448  
449  
450  
451  
452  
453  
454  
455  
456  
457  
458  
459  
460  
461  
462  
463  
464  
465  
466  
467  
468  
469  
470  
471  
472  
473  
474  
475  
476

Thus, these data contradict the idea that bdelloid TEs are inactive. All TE superfamilies in other bdelloids show a substantial fraction of copies at low-divergence, indicative of recent proliferation. Moreover, there are multiple cases of insertion-site polymorphism within species, and at least one case where a recent retroelement insertion into a protein-coding sequence seems likely to have potential fitness consequences.

**No evidence that cryptic recombination helps to limit the spread of LTR-Rs.** Another possible explanation for the apparent discrepancy between bdelloid TE profiles and theory is that bdelloids in fact possess cryptic inter-individual recombination, either through undetected sex or some alternative form of gene transfer. We therefore tested for a signature of recombination among polymorphic LTR-R insertion sites within species. Under strict clonality, the pattern of presence and absence across LTR-R loci should be nested and compatible with only mutational gain and loss at each site. In contrast, in a sexual, outcrossing population, variation should be shuffled among loci. LTR-Rs provide a powerful test of these predictions because random insertion makes independent origins of the same LTR-R insertion site highly unlikely.

In every species with multiple samples, we found that variation in polymorphic TEs is perfectly nested, with a consistency index in parsimony reconstruction of 1. Furthermore, in the two species with multiple parsimony-informative characters, *R. socialis* and *R. magnacalcarata*, we found a significantly positive index of association of presence and absences among LTR-R insertion sites, as expected with clonal inheritance (S3 Table; S6 Fig). Approximate Bayesian Computation with simulations of expected patterns under varying frequencies of sexual reproduction showed that strictly clonal evolution could not be rejected (S7 Fig). While this test uses a restricted set of markers, and so should not be viewed as a test of recombination for the whole genome or species, it does support clonal inheritance of LTR-R loci and finds no evidence that inter-individual recombination helps to limit their spread. Nevertheless, local LTR-LTR recombination within genomes, leading to solo LTR formation, may act to bring the copy number down [44].

**No evidence for lower TE loads in desiccating bdelloids.** The desiccation hypothesis posits that TE numbers may be kept in check via the action of DSB-repair processes during recovery from desiccation. Our study includes 11 nondesiccating bdelloid samples encompassing three obligately aquatic species (*R. macrura*, *R. magnacalcarata* and *R. socialis*), while the remaining samples were isolated from ephemeral ponds or moss and must undergo frequent cycles of desiccation and rehydration to survive. Contrary to the prediction that TE load should be reduced in desiccating species, there is little overall difference in TE proportions between desiccating and nondesiccating lineages (mean = 4.8% ± 1.3% vs. 5.0% ± 0.9% respectively). Broken down by TE superfamily, desiccating taxa have relatively more DNA transposons, simple, low complexity and unclassified repeats, and relatively fewer PLE, LTR and LINE-like retroelements (S3 Fig; S8a Fig), with the biggest differences seen between *Rotaria* lineages (S8b Fig). However, perhaps unsurprisingly given only two independent shifts in desiccation ability within our sample (see phylogeny in Fig 2a), results from a Bayesian mixed-effects modelling approach that controlled for phylogenetic relationships showed no significant correlations between desiccation ability and TE load, for either overall proportion or for any individual TE superfamily (S4 Table). For most TE superfamilies the strength of the phylogenetic signal ( $\lambda$ ) was close to 1 (S9 Fig), consistent with a high fit of the data to the phylogeny under a Brownian motion model as would be expected if TE load evolves neutrally along branches of the phylogeny.

477 Two further comparisons of desiccating versus nondesiccating species among our wider sample  
478 of animals also present contrasting results. In chironomid midges, the desiccation-tolerant *P.*  
479 *vanderplanki* encodes substantially fewer TEs than its nondesiccating sister species *P. nubifer*, as  
480 predicted (0.8% and 2.2% respectively, although this rises to ~11% in both species when all  
481 repeats are included). In tardigrades, however, the desiccation tolerant *Ramazzottius*  
482 *varieornatus* encodes a greater proportion of TEs than *Hypsibius exemplaris* (4.3% and 2.8%,  
483 respectively), which does not survive desiccation without extensive conditioning [81], although  
484 the trend is reversed when all repeats are included due to a large fraction of simple repeats in *H.*  
485 *exemplaris*. We therefore find no consistent evidence for the hypothesised link between  
486 anhydrobiosis and TE load in bdelloids or beyond. The overall effect of desiccation on TEs  
487 might be dual: while repair of a DSB within a TE via non-homologous end-joining would likely  
488 result in its inactivation (thus acting to reduce TE load), an efficient DSB repair system would  
489 enhance repair of DSBs that arise during transposition of cut-and-paste DNA TEs that leave a  
490 DSB behind upon excision (thus allowing an increased TE load).

491  
492 **Bdelloids experience similar selective constraints on TEs as do other species.** A fourth  
493 hypothesis is that the selective environment for TEs is different in bdelloids than in other  
494 animals, thereby shifting their TE profiles compared to simple theory. For instance, bdelloids  
495 might tolerate insertions within genes unusually well, owing to redundancy arising from  
496 tetraploidy or multiple gene copies [45,91,92]. First, we explored the genomic ‘environment’ of  
497 TE insertions and their potential effects on genome function. Differences in the location of TE  
498 insertions might reveal differential costs and benefits compared to other taxa. To do this, we first  
499 compiled a high-confidence list of class I retrotransposons by searching for proteins with  
500 significant similarity to the reverse transcriptase (RT) domain found in all retrotransposons.  
501 Phylogenies of the resulting alignments showed a diverse array of RTs in all species, most of  
502 them full-length (in terms of conserved subdomain presence) and clustered within the three  
503 primary retrotransposon superfamilies of PLEs, LTRs and LINEs (**Fig 5a**; S10 Fig; S5 Data).  
504 Many (but not all) clustered within families previously identified in *A. vaga*. The elevated LINE  
505 content in *D. carnosus* in comparison to other bdelloids is mostly due to the expanded Soliton  
506 clade and to the presence of CR1-Zenon and Tad/I/Outcast clades, the latter being characterized  
507 by the presence of the RNase H domain.

508  
509 We then characterised surrounding genome features for these TEs. In 50 kb windows  
510 surrounding each class I TE identified above, we counted the occurrence and span of three  
511 features of interest: other (non-TE) genes, other (non-focal) TEs, and the telomeric repeat  
512 “TGTGGG” (identified from *A. vaga* [58] and supported in other rotifers, see S2 Note). Relative  
513 to a set of core metazoan (BUSCO) genes, the regions surrounding PLE, LINE and LTR TEs all  
514 showed significant decreases in gene density, but significant increases in both TE and sub-  
515 telomeric repeat density (**Fig 5b–d**; S5 Table). In contrast, using a linear mixed-effects  
516 modelling approach (see Materials and methods), there were no significant differences between  
517 the monogonont *B. calyciflorus* and bdelloids, or between desiccating and nondesiccating  
518 bdelloid species (S5 Table). These results are consistent with previous findings that TEs are  
519 mainly confined to sub-telomeric regions of bdelloid genomes [56], a bias that is presumably due  
520 to either selection against insertions at or near functioning genes and/or strong specificity in TE  
521 insertion site. Thus, it appears that most TE insertions are costly in bdelloid rotifers, as in other  
522 taxa, and that selection leads to their concentration outside of gene-rich regions.

523  
524

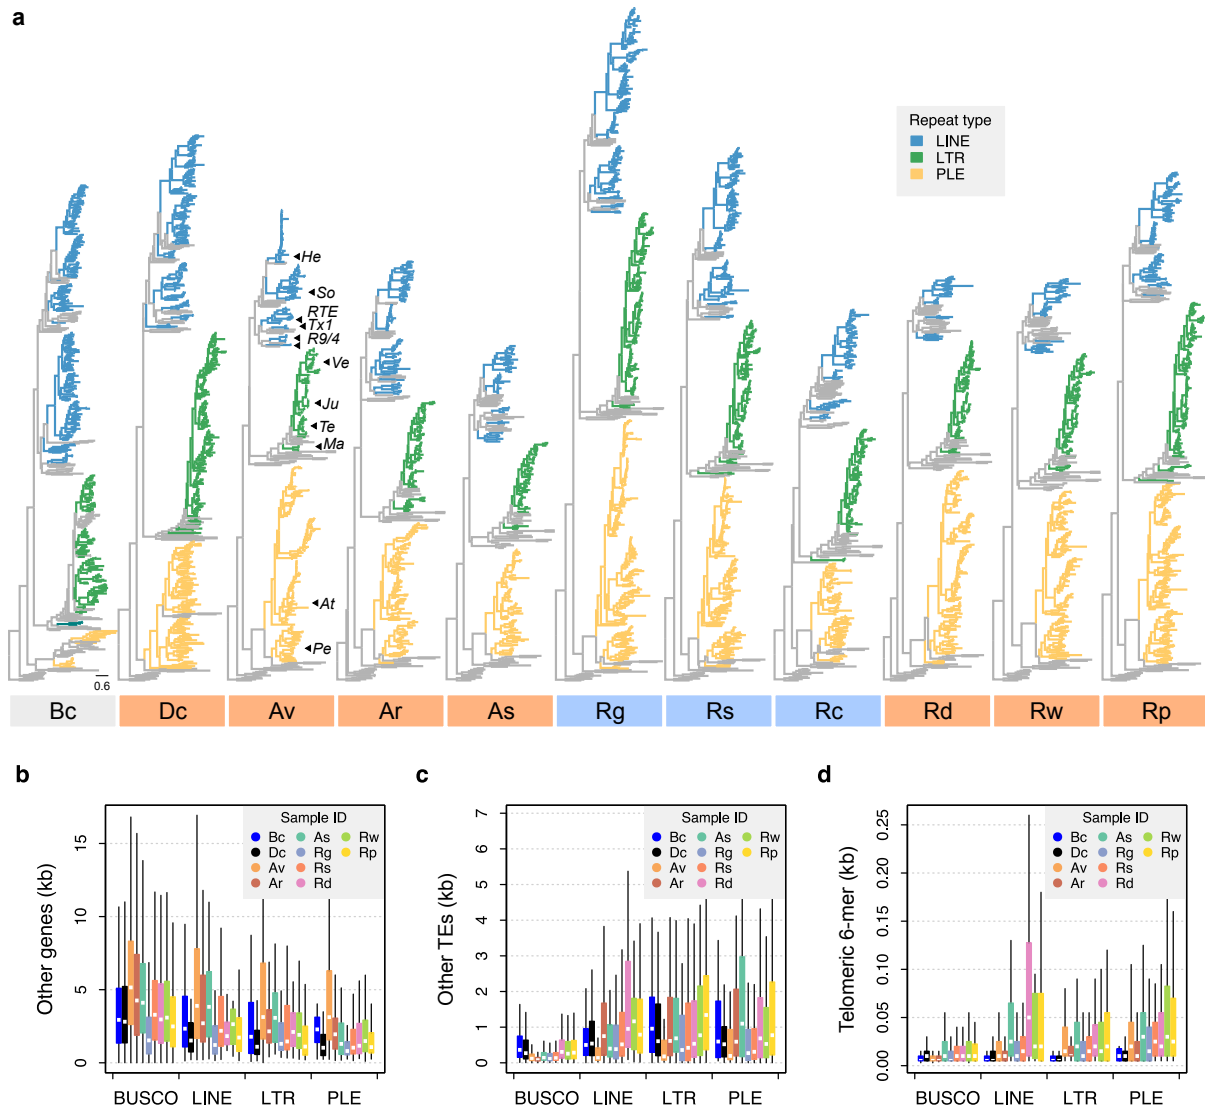

525  
 526  
 527 **Fig 5. Phylogenetic diversity and genomic context of reverse transcriptase genes.** (a) For each  
 528 phylogeny, coloured branches represent identified rotifer-encoded RT copies and grey branches  
 529 represent the core RT sequences from which the HMM was built (see Materials and methods and S9 Fig  
 530 for core RT tree details). Colours indicated the major superfamilies. Previously characterised  
 531 retrotransposons are indicated on the *A. vaga* tree (**He**, *Hebe*; **So**, *Soliton*; **RTE**, *RTE*; **Tx1**, *Tx1*; **R9/4**, *R9*  
 532 and *R4*; **Ve**, *Vesta*; **Ju**, *Juno*; **Te**, *TelKA*; **Ma**, *Mag*; **At**, *Athena*; **Pe**, *Penelope*). All phylogenies are rooted  
 533 on the branch separating the bacterial retrans. Scale bar represents 0.6 amino acid substitutions per site.  
 534 Desiccating and nondesiccating species are indicated with orange and blue, as previously. Species  
 535 codes: **Bc**, *B. calyciflorus* PSC1; **Dc**, *D. carnosus* DCAR706; **Av**, *A. vaga* Av2013; **Ar**, *A. ricciae*  
 536 ARIC003; **As**, *A. steineri* ASTE805; **Rg**, *R. magnacalcarata* MAG3; **Rs**, *R. socialis* AK11; **Rc**, *R. macrura*  
 537 Rc2018; **Rd**, *R. sordida* RSOR408; **Rw**, *R. sp.* ‘Silwood-1’ RSIL806; **Rp**, *R. sp.* ‘Silwood-2’ RPSE503.  
 538 The genomic context in which RT genes reside is then described based on proximity to three other  
 539 features: (b) ‘other’ genes (that do not overlap with any TE annotation), (c) other TEs, and (d) telomeric  
 540 repeats (“TGTGGG”; that do not overlap with any coding region) as identified in *A. vaga*. For each plot, a  
 541 25 kb window is drawn around the focal RT gene and the total span (kb) of each feature within the  
 542 window is counted, broken down per sample ID (coloured boxes) per TE superfamily (X-axis groups).  
 543 Boxplots show the median (band), interquartile range (box) and minimum/maximum values (whiskers;  
 544 outliers not plotted). The equivalent data for BUSCO genes (metazoan set) are also shown for  
 545 comparison. The same representative samples are used in (b–d) as for (a).

546  
 547

548 As a second source of selective constraints, we tested for evidence of selection against ectopic  
549 recombination (ER). ER is argued to be a major cost of TEs in sexual taxa, but its effects derive  
550 from chromosomal abnormalities during meiosis, which should be lacking in bdelloids. Because  
551 the rate of ER increases with both the number of elements and their length [12], the strength of  
552 selection is expected to be strongest against longer TEs at higher copy number [9,24,93]. Two  
553 testable predictions arise: first, that bdelloids should have longer TEs than sexual taxa (under the  
554 hypothesis that ER is absent in bdelloids because of a lack of meiosis), and second, that  
555 nondesiccating bdelloids should have longer TEs than desiccating bdelloids (under the  
556 hypothesis that ER may still occur when chromosomes pair during the repair of DSBs).  
557 However, comparisons of TE length distributions provide no evidence for these predictions—  
558 there was no significant difference between monogononts and bdelloids, or between desiccating  
559 and nondesiccating bdelloids (**Fig 6a**; S6 Table; S6 Data). Thus, while the precise estimation of  
560 TE lengths will no doubt improve with increasing assembly contiguity, our current data do not  
561 show any indication of changes in TE length linked to asexuality (when compared to  
562 monogononts) or desiccation ability within bdelloids. It is interesting to note that this finding  
563 also applies to the PLEs, which include the *Athena* elements that comprise the unusually large  
564 and complex *Terminon* elements found at bdelloid telomeres [59,94]. In this case, it is possible  
565 that selection may still act on individual *Athena* elements but does not affect *Terminons* per se  
566 because their structural diversity and genomic location does not make them targets of ER.

567  
568 A final prediction of selection against ER is that there should be a negative correlation between  
569 TE frequency and length, as is observed in *Drosophila* [24] and humans [93]. For both  
570 monogononts and bdelloids, the majority of identified TEs are short (< 1 kb), which are  
571 presumably partial matches or degraded copies. Nonetheless, we observe a sharp decline in copy  
572 number as mean TE length increases above ~0.5 kb, and a distinct lack of longer elements at  
573 higher copy numbers (**Fig 6b**). In vertebrates, previous work has suggested a lower threshold of  
574 ~0.6–1 kb under which ectopic recombination does not operate [93,95]. Thus, the observed  
575 patterns in rotifers are consistent with the hypothesis that longer elements above a certain length  
576 threshold are selected against more strongly due to the deleterious effects of ectopic  
577 recombination. This finding is contrary to a similar analysis performed on TEs in nematodes,  
578 which did not recover the expected relationship [18]. However, the pattern is the same in both  
579 desiccating and nondesiccating bdelloid representatives as well as the monogonont *B.*  
580 *calyciflorus*, and to some extent the acanthocephalan *P. laevis* (S11 Fig), suggesting that  
581 selection against longer TEs at higher copy number is a general feature in Syndermata,  
582 regardless of desiccation ability.

583  
584

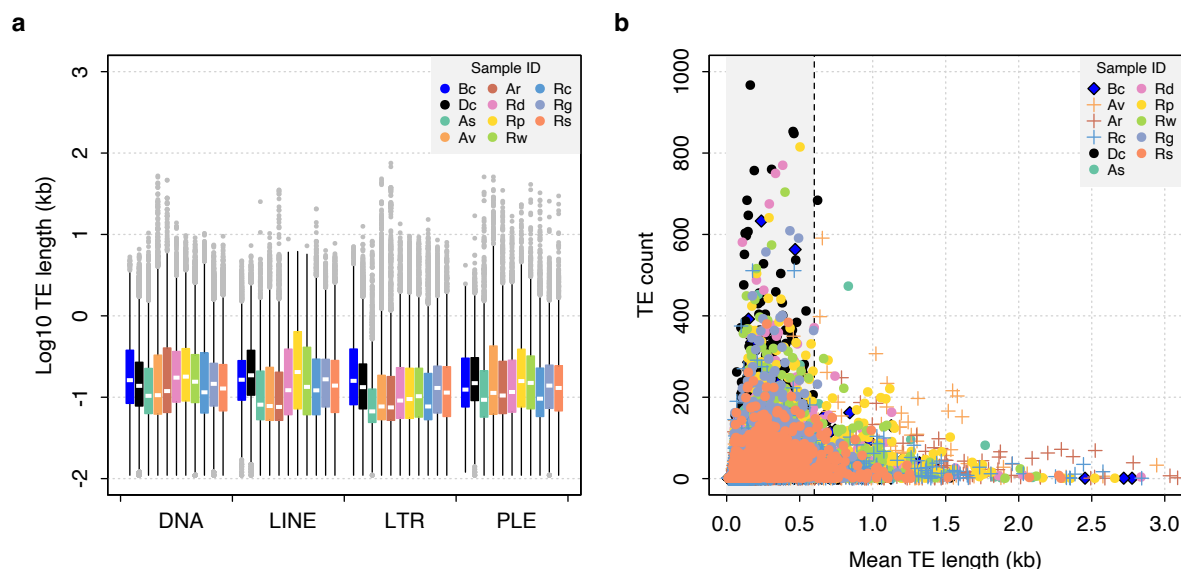

585  
586  
587 **Fig 6. TE length dynamics.** (a) Distribution of TE length for selected syndermatan samples decomposed  
588 into the major TE superfamilies (DNA transposons, LINE-like, LTR and PLE retrotransposons). Boxplots  
589 show the median (band), interquartile range (box) and minimum/maximum values (whiskers; outliers are  
590 shown in grey). Species codes: **Bc**, *B. calyciflorus* PSC1 (monogonont); **Dc**, *D. carnosus* DCAR706; **As**,  
591 *A. steineri* ASTE804; **Av**, *A. vaga* Av2013; **Ar**, *A. ricciae* Ar2018; **Rd**, *R. sordida* RSOR408; **Rp**, *R. sp.*  
592 'Silwood-2' RPSE411; **Rw**, *R. sp.* 'Silwood-1' RSIL801 (desiccating bdelloids); **Rc**, *R. macrura* Rc2018;  
593 **Rg**, *R. magnacalcarata* MAG1; **Rs**, *R. socialis* AK11 (nondesiccating bdelloids). An equivalent plot  
594 including the acanthocephalan *P. laevis* is shown in S10 Fig. (b) Relationship between mean TE length  
595 per TE family (X-axis) and copy number (i.e., the number of TEs identified within each family; Y-axis). The  
596 same set of individuals are shown as for (a). A dashed line is drawn at 0.6 kb, given as the length  
597 threshold under which the rate of homologous ectopic recombination is negligible in mice.

598  
599  
600 **Large expansion of TE silencing pathways in bdelloids.** Having rejected a range of hypotheses  
601 to reconcile theory and observation of TE levels in bdelloid rotifers, we finally looked for  
602 expansions and/or diversifications in the molecular pathways that defend against TEs. We  
603 characterised copy number variation for three well-known gene families with direct roles in TE  
604 suppression via RNA interference (RNAi). (1) Argonaute proteins of both the Ago and Piwi  
605 subfamilies, the core effectors of RNAi gene-silencing that form complexes with various classes  
606 of small RNA [96,97]; (2) Dicer, an RNase III-family protein that cleaves double-stranded RNA  
607 (dsRNA) molecules from 'target' genes into shorter fragments that are subsequently incorporated  
608 into Argonaute complexes [98,99]; and (3) RNA-dependent RNA polymerase (RdRP), an RNA  
609 replicase that synthesises secondary small interfering RNAs (siRNAs) that amplify the silencing  
610 response [98,100].

611  
612 Based on hidden Markov model (HMM) matches of key domains to the predicted proteomes of  
613 the Illumina maxhap assemblies (in which homologous copies are largely collapsed), we detect  
614 an average of 21.5 putative Argonaute copies, 3.9 Dicer copies and 37.3 RdRP copies in bdelloid  
615 genomes (Fig 7a; S4 Data). These expansions are substantially larger than previously uncovered  
616 from the diploid assembly of *A. vaga* (eight Dicers, 23 Ago/Piwi, 20 RdRP per diploid genome)  
617 [44], particularly after correcting for the assembly resolution (i.e. diploid vs haploid assembly;  
618 see Materials and methods), perhaps due to the increased sensitivity of the HMM-based  
619 approach, or to different degrees of pseudogenization and/or homolog collapse. Phylogenies of  
620 identified copies revealed a number of divergent clades, particularly in the Argonaute and RdRP  
621 families (Fig 7b–d; S12 Fig; S7 Data; S8 Data), that might indicate both expansion and



622 diversification of these proteins. Even accounting for degenerate tetraploidy in bdelloids, the  
623 RdRP domain in particular is significantly expanded relative to monogononts and other  
624 eukaryotes (**Fig 7e–g**; S9 Data). This expansion is not found in the monogononts *B. calyciflorus*  
625 or *B. plicatilis* HYR1, nor is there evidence for it in the (unannotated) acanthocephalan genome  
626 (S4 Data), suggesting that the expansions seen in Ago and (particularly) RdRP are unique to  
627 bdelloids, including the basally divergent *D. carnosus*.

628  
629 The expansion of bdelloid-specific Ago genes (denoted ‘BDAGOs’ in **Fig 7**) is comparable to  
630 the ‘worm-specific’ Ago clade (WAGOs) found in nematodes [101–103]. Intriguingly, the  
631 majority of nematode species (although not *C. elegans*) have apparently lost their Piwi-like  
632 orthologue, the branch of the Argonaute family that is usually involved in TE suppression in  
633 most other animals [104], but instead mediate TE silencing using a Dicer/RdRP pathway [105].  
634 The primary function of RdRP is to amplify RNAi responses via the production of small  
635 interfering RNAs (siRNAs) [98], but this family is found only rarely in animal genomes [100]. In  
636 *C. elegans*, RdRP-generated siRNAs (known as ‘22G-RNAs’) also play important roles in the  
637 recognition of ‘self’ versus ‘non-self’ RNA and multigenerational (i.e., inherited) epigenetic  
638 memory [103,106]. However, an analysis of TE variation across the nematode phylum found no  
639 effect of RNAi pathway differences (in terms of presence/absence of RNAi genes) among  
640 species, concluding that TE content is mediated primarily by the stochastic action of genetic drift  
641 [18].

642  
643 Why do bdelloids possess such a marked expansion of gene silencing machinery? One  
644 explanation may be that it was required as part of the successful long-term transition to  
645 asexuality, if other mechanisms usually acting in sexual populations were no longer operating.  
646 Intriguingly, it has been shown in *A. vaga* that piwi-interacting small RNAs (piRNAs) target  
647 both TEs and putatively ‘foreign’ genes (i.e. non-metazoan genes gained via horizontal gene  
648 transfer [HGT]) [107], the latter of which are unusually frequent in bdelloid genomes  
649 [44,46,108–110]. Thus, it may be the case that bdelloids have an enhanced RNAi system to  
650 defend against invasion from horizontally transferred TEs, particularly if the level of exposure or  
651 rate of import is higher relative to other animals. Furthermore, the ability of some RNAi  
652 pathways to distinguish self from non-self may be needed to maintain genome integrity over  
653 longer timescales, if such mechanisms are operating. Further work on the precise functions of the  
654 divergent Ago and RdRP clades is required to explore these possibilities.

655  
656

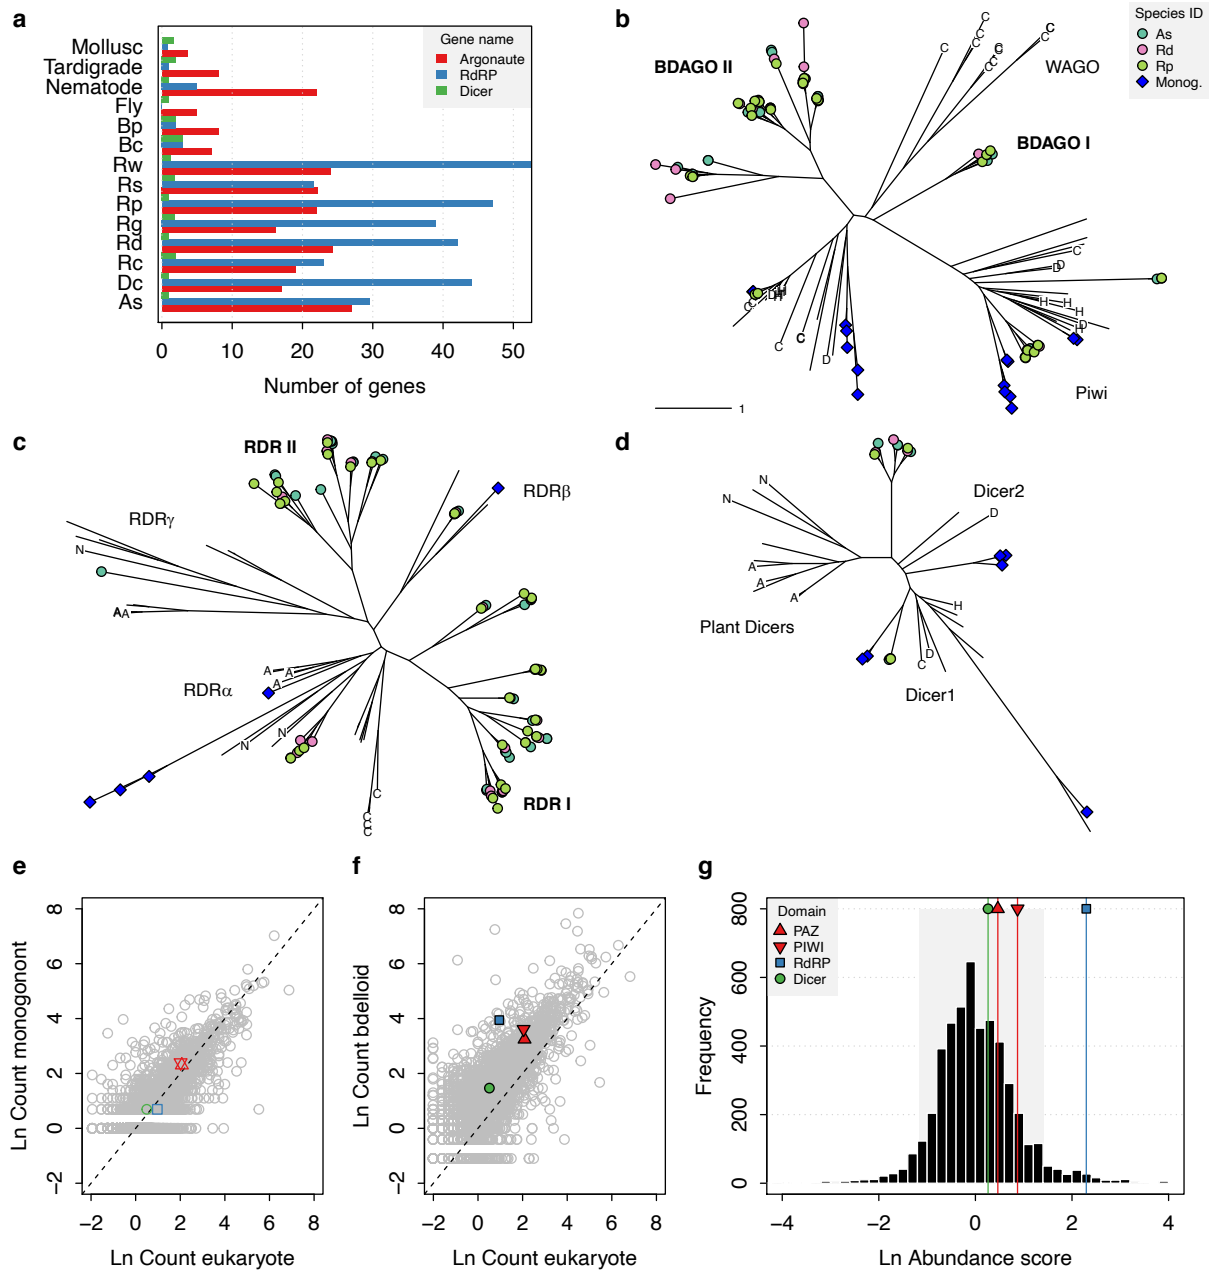

657  
 658  
 659 **Fig 7. Expansion of TE silencing pathways in bdelloid rotifers.** (a) Copy number variation for RNAi  
 660 gene families Argonaute (Ago/Piwi, red), RNA-dependent RNA polymerase (RdRP, blue) and Dicer  
 661 (green) in bdelloids compared to other protostome groups. Proteins are identified based on the presence  
 662 of key identifying domains (see Materials and methods). Species codes for rotifers: **Bc**, *B. calyciflorus*;  
 663 **Bp**, *B. plicatilis* HYR1; **Dc**, *D. carnosus*; **As**, *A. steineri*; **Rg**, *R. magnacalcarata*; **Rs**, *R. socialis*; **Rc**, *R.*  
 664 *macrura*; **Rd**, *R. sordida*; **Rw**, *R. sp.* 'Silwood-1'; **Rp**, *R. sp.* 'Silwood-2'. Maximum likelihood unrooted  
 665 phylogenies are then shown for (b) Argonaute, (c) RdRP and (d) Dicer gene copies identified in *A.*  
 666 *steineri*, *R. sordida* and *R. sp.* 'Silwood-1' 10x haploid ('pseudohap') assemblies, aligned with orthologs  
 667 from representative species from across the eukaryotes. Blue symbols indicate copies identified in the  
 668 monogonont *B. plicatilis*, and letters on tips show selected reference species to aid visual orientation: 'C',  
 669 *C. elegans*; 'H', human; 'D', *D. melanogaster*; 'N', *N. crassa*; 'A', *A. thaliana*. Some clade names are also  
 670 shown where relevant; 'WAGO' indicates the worm-specific cluster of Ago genes in the Argonaute  
 671 phylogeny. 'BDAGO' I and II and 'RDR' I and II indicate putative bdelloid-specific clades of Argonaute and  
 672 RdRP proteins, respectively. (e) Comparative protein-domain abundance plot. Each point represents a  
 673 Pfam domain ID, with (log) average abundance (i.e., count) in the reference eukaryote set shown on the  
 674 X-axis and (log) abundance in the monogonont *B. plicatilis* on the Y-axis (see Materials and methods).  
 675 The positions of the PAZ, PIWI (red up/down triangles), RdRP (blue square) and Dicer (green circle)  
 676 domains are highlighted. Dashed line indicates the 1-1 relationship. (f) Equivalent plot for bdelloids,

677 where the Y-axis shows the (log) average abundance for the *A. steineri*, *R. sordida* and *R. sp.* 'Silwood-1'  
678 10x haploid assemblies. Note that the average abundance for all Pfam entries is shifted above the 1-1  
679 line due to the ancient genome duplication in all bdelloids, such that many genes are found in double  
680 copy (i.e., homoeologs) even in a 'haploid' representation. (g) Comparative protein–domain abundance  
681 plot for bdelloids versus eukaryotes (see Materials and methods). Entries to the right of the distribution  
682 are overrepresented in bdelloids with respect to eukaryotes. The shaded area represents the 5% and  
683 95% quantiles of the distribution, and the scores for the PAZ, PIWI, Dicer and RdRP domains are  
684 indicated (see legend).

685  
686

## 687 **Conclusions**

688

689 We show that all bdelloids encode a rich diversity of TEs from both class I (retroelements) and  
690 class II (DNA transposons), and thus reject the idea that bdelloids are deficient or unusual in  
691 their TE content or diversity. Moreover, a substantial fraction of these elements has been active  
692 relatively recently within populations. This finding is at odds with the original predictions of  
693 population genetic theory for TEs in asexuals. One possible resolution is that theory is missing  
694 some component or assumption. It is possible that parameter space exists that permits  
695 intermediate levels of TEs in an asexual population, perhaps sustained by high rates of horizontal  
696 transfer, which there is evidence for in bdelloids. The HGT idea has some support from the  
697 increased prevalence of class II DNA transposons in bdelloids, given their greater propensity for  
698 horizontal transfer, but we found that the basally divergent lineage leading to *D. carnosus* had a  
699 profile more like the monogonont rotifers with regard to non-LTR retrotransposon abundance,  
700 despite sharing other features with the rest of bdelloids. Alternatively, some TEs might have  
701 been co-opted to provide beneficial functions, which is hypothesised to explain the unusually  
702 large and complex *Terminon* repeats. Other TEs may have evolved strong site-specificity to  
703 neutral genome regions to mitigate negative effects of transposition. This idea is supported by  
704 the preference shown for insertions into gene-poor regions that are probably at or near the  
705 telomeres, although it seems unlikely that the full complement of bdelloid TEs have accumulated  
706 in this way.

707

708 We also ask what forces may be acting to suppress TE activity in bdelloid populations. A major  
709 finding is that an abundance and diversity of RNAi gene silencing pathways, characterised by a  
710 large expansion of Argonaute and RdRP genes, appears to be a unique feature of bdelloid  
711 genomes. The precise origins and functions of these divergent Ago and RdRP clades are yet to  
712 be elucidated, but it seems likely that such an extended arsenal of TE defence genes offers  
713 enhanced protection against the deleterious effects of TE activity, particularly if bdelloid  
714 populations cannot keep TEs in check through sexual processes but are still exposed to new  
715 invasions via HGT. This enhanced RNAi system may then provide a more deterministic action  
716 against TEs, as opposed to stochastic forces (such as genetic drift) that may predominate in other  
717 animal groups and may potentially explain the greater uniformity of TE proportions in bdelloids  
718 relative to monogononts.

719

720 An alternative resolution is that the assumption of no recombination and strict clonality is not  
721 met in bdelloids. Previous work, for example, proposed that intra-individual recombination  
722 during the repair of DSBs caused by desiccation could provide a mechanism to keep TE numbers  
723 in check. We found no evidence here that overall TE loads were lower in desiccating species  
724 than nondesiccating species, a finding not limited to bdelloids, or for differences in activity or  
725 rate of turnover between them. It remains possible that an equivalent mechanism, such as mitotic  
726 recombination, or unusual DNA repair mechanisms operating in nondesiccating species as well,  
727 could still act to limit TE proliferation and facilitate elimination of inserted copies, maintaining

728 an equilibrium between TE spread and removal by excision and selection. Finally, there could be  
729 some hidden mechanism of inter-individual recombination that facilitates TE removal. We found  
730 no evidence for its action here, but further work is needed for a final answer on the conundrum  
731 of bdelloid asexuality.

732  
733

## 734 **Materials and methods**

735

736 **Rotifer sampling and culture.** For most samples, individual rotifers were collected from  
737 permanent and temporary freshwater habitats around Imperial College London’s Silwood Park  
738 campus, Ascot, UK between May 2015 and February 2019. Three samples (*R. magnacalcarata*  
739 RM9 and RM15, and *R. socialis* RS1) were collected from a freshwater spring in Fontaneto  
740 d’Agogna, Italy in 2016 (see S1 Data for details). Although we focused on the genera *Adineta*  
741 and *Rotaria*, we also included two individuals from the desiccation-tolerant species  
742 *Didymodactylos carnosus*. Preliminary phylogenetic data had identified this as a distant outgroup  
743 to the focal genera, useful in rooting phylogenetic trees and as a further independent datapoint to  
744 test the generality of conclusions about bdelloids. A total of 26 samples were submitted for  
745 single-individual, whole genome sequencing; for these, DNA was extracted using either a Chelex  
746 preparation (Bio-Rad InstaGene Matrix) or a QIAamp DNA Micro Kit (Qiagen), and whole-  
747 genome amplified using a REPLI-g Single Cell kit (Qiagen) before sequencing on either  
748 Illumina NextSeq500 at the Department of Biochemistry, University of Cambridge (Cambridge,  
749 UK), or Illumina HiSeq X at Edinburgh Genomics, University of Edinburgh (Edinburgh, UK).  
750 For *A. ricciae* ARIC003, DNA was extracted from ~200 animals descended from a single  
751 individual before whole-genome amplification. For *B. calyciflorus* PSC1, individuals for DNA  
752 extractions were derived from an individual isolate from a laboratory stock population previously  
753 isolated from field-collected resting eggs [111]. DNA was extracted from ~5000 starved  
754 individuals using a phenol-chloroform protocol and sequenced on the Illumina NextSeq500 at  
755 the Max Planck Institute for Evolutionary Biology. Three 10x Genomics Chromium ‘linked  
756 reads’ libraries were generated for *A. steineri*, *Rotaria* sp. ‘Silwood-1’ and *R. sordida*; for these,  
757 high molecular weight DNA was extracted from thousands of animals reared clonally from a  
758 single wild-caught animal, without whole-genome amplification, using the Chromium  
759 Demonstrated Protocol “HMW gDNA Extraction from Single Insects”  
760 (<https://support.10xgenomics.com/permalink/7HBJeZucc80CwkMAmA4oQ2>). Linked-read  
761 libraries were constructed at the Centre for Genomics Research, Liverpool, UK, before  
762 sequencing on the HiSeq X at Edinburgh Genomics. Further details on rotifer sampling, DNA  
763 extraction and sequencing are provided in S1 Data.

764

765 **Biological replicates.** To check the repeatability of the whole-genome amplification (WGA),  
766 sequencing, assembly and analysis pipelines, we included several samples that were either  
767 biological replicates of the same rotifer clone, or where high-quality genomes were available for  
768 the same clone from unamplified source material. Specifically, for *Rotaria* sp. ‘Silwood-2’ we  
769 isolated two consecutive offspring from the same wild-caught mother and conducted WGA,  
770 sequencing, assembly and analysis for these sisters independently (as Rp\_RPSE411 and  
771 Rp\_RPSE503). From the same clonal laboratory line of *Rotaria* sp. ‘Silwood-1’ that was used  
772 for 10x Genomics DNA preparation, we isolated two more individuals and processed each  
773 independently using the WGA workflow (as Rw\_RSIL801 and Rw\_RSIL802). Finally, we  
774 applied the WGA method to DNA from *A. ricciae*, for which a previous assembly was available  
775 from unamplified DNA [46] on the same clonal culture and included this replicate in  
776 downstream analyses alongside the earlier reference assembly.

777



778 **Data filtering and genome assembly.** We generated two assembly versions for each of the  
779 single-individual rotifer samples. The ‘reference’ assemblies were scaffolded and polished to  
780 result in haploid assemblies with improved contiguity. The ‘maximum haplotig’ (‘maxhap’)  
781 assemblies instead retained highly similar contigs that might otherwise be removed during  
782 assembly polishing. Our pipeline is outlined as follows.

783  
784 For the Illumina libraries, raw sequence data were filtered for low quality bases and adapter  
785 sequence using BBTools v38.73 ‘bbduk’ (<https://sourceforge.net/projects/bbmap/>), and error  
786 corrected using BBTools ‘tadpole’. Data quality was inspected manually using FastQC v0.11.5  
787 [112] aided by MultiQC [113] visualisation. For the *A. steineri*, *R. sp.* ‘Silwood-1’ and *R.*  
788 *sordida* linked-read libraries, data were assembled into haploid (‘pseudohap’) and diploid  
789 (‘megabubbles’) genome representations using the 10x Genomics proprietary software  
790 Supernova v2.1.1 [114] and further scaffolded with ARKS v1.0.4 [115]. All raw sequencing data  
791 are deposited in the relevant International Nucleotide Sequence Database Collaboration (INSDC)  
792 databases under the Study ID PRJEB39843 (see S1 Data for run accessions and counts for raw  
793 and filtered data).

794  
795 For the single-individual samples, an initial assembly was generated using SPAdes v3.13.0 [116]  
796 with default settings. Contaminating reads from non-target organisms, identified based on  
797 aberrant GC content, read coverage and/or taxonomic annotation, were then identified and  
798 removed using BlobTools v1.1.1 [117,118]. For *R. magnacalcarata* and *R. socialis* samples,  
799 resultant haplotigs were then collapsed using Redundans [119] with default settings before  
800 scaffolding and gap filling with SSPACE v3.0 and GapCloser v1.12 respectively [120,121]. For  
801 *A. steineri*, *R. sp.* ‘Silwood-1’ and *R. sordida* single-individual samples, the scaffolding step was  
802 performed with RaGOO v1.1 [122,123], using the matching 10x Genomics ‘pseudohap’  
803 assembly as a reference (contigs from *R. sp.* ‘Silwood-2’ were scaffolded using the *R. sp.*  
804 ‘Silwood-1’ 10x reference), specifying the ‘-C’ parameter to prevent concatenation of unaligned  
805 contigs. Scaffolded assemblies were subjected to further rounds of BlobTools to remove any  
806 additional sequences derived from non-target organisms. These assemblies were designated the  
807 reference set described above.

808  
809 For the maxhap assemblies, filtered fastq files were first generated by mapping the original  
810 (trimmed and error-corrected) sequencing reads to each reference genome, using the  
811 ‘outm=filtered\_R#.fq’ functionality of BBTools ‘bbmap’, and then reassembled with SPAdes,  
812 increasing the final kmer value to 121. Assembly metrics were summarised using ‘calN50.js’  
813 (<https://github.com/lh3/calN50>), which reports the ‘expected scaffold size’ (AU) as an alternative  
814 metric of assembly contiguity that is less biased than N50 (defined as the area under the  
815 cumulative genome span versus contig length graph, equivalent to the expected scaffold size for  
816 a randomly chosen assembly location [124]). Gene-completeness scores for core eukaryotic ( $n =$   
817 303) and metazoan ( $n = 978$ ) genes were calculated for all assemblies using BUSCO v3.0.2  
818 [125] with default settings. Reference and maxhap assemblies for *B. calyciflorus* PSC1 and *D.*  
819 *carnosus* are the same, due to a lack of appropriate data for scaffolding.

820  
821 **Gene prediction.** Gene prediction was performed on reference assemblies using one of three  
822 approaches, depending on the availability of RNA-seq data. For *B. calyciflorus*, *A. ricciae*, and  
823 all *R. magnacalcarata*, *R. socialis*, and *R. sordida* assemblies, published RNA-seq data  
824 [109,110,126] were downloaded from NCBI Sequence Read Archive (SRA), quality-trimmed  
825 using BBTools ‘bbduk’ with default settings and aligned to the genomic scaffolds using STAR  
826 v2.7.3a [127] with the option ‘--twoPassMode Basic’. Aligned BAM files were then provided to  
827 BRAKER v2.1.2 [128–132] with default settings for gene prediction. For *A. steineri*, *R. sp.*



828 ‘Silwood-1’ and *R. sp.* ‘Silwood-2’ assemblies, RNA-seq data from a related species (*A. ricciae*  
829 and *R. magnacalcarata* respectively) were used instead, aligned using BBTools ‘bbmap’ with the  
830 options ‘maxindel=200k minid=0.5’, before gene prediction with BRAKER as above. Finally,  
831 for the distantly related *D. carnosus*, BRAKER was run using gene-model parameters estimated  
832 from BUSCO analysis of the genomic scaffolds. The quality of predicted proteins was assessed  
833 using BUSCO in protein mode. Intra-genomic divergence between homologous gene copies and  
834 collinearity was calculated as for Nowell *et al.* (2018) and described in S1 Note. Genome  
835 assemblies and gene predictions were converted to EMBL format using EMBLmyGFF3 v2  
836 [133], and are deposited at DDBJ/ENA/GenBank under the Study ID PRJEB39843 (see **Table 1**  
837 and S1 Table for individual GenBank accessions).

838  
839 **Rotifer phylogeny.** Evolutionary relationships among new genomes and published genomes of  
840 rotifers were determined using a core-genome phylogenomics approach based on the BUSCO  
841 eukaryotic gene set. For genomes from species with very high intra-genomic homologous  
842 divergence (*A. ricciae* and *A. vaga*), redundancy was removed by selecting the copy with the  
843 highest BUSCO score for all BUSCO genes with multiple copies, using the script  
844 BUSCO\_collapse\_multicopy.pl’ (<https://github.com/reubwn/scripts>). One-to-one co-orthologs  
845 found in at least 95% of the samples were then identified using the script  
846 ‘BUSCO\_phylogenomics.py’ ([https://github.com/jamiemcg/BUSCO\\_phylogenomics](https://github.com/jamiemcg/BUSCO_phylogenomics)). Protein  
847 sequences were aligned using ClustalO [134] and concatenated in Geneious R9 [135]. The full  
848 alignment was checked by eye and sections with ambiguous alignment within the bdelloid clade  
849 were removed across all sequences to avoid aligning potential paralogs or homoeologs.  
850 Translation errors arising from annotation issues in specific bdelloid genomes were identified by  
851 obvious mismatches to the consensus of closely related genomes, and the affected residues were  
852 deleted in the affected genome only. Potential alignment issues within the monogonont clade  
853 were less obvious owing to the substantial genetic divergence from bdelloids and the smaller  
854 number of genomes and replicates, so corrections were less stringent. A maximum-likelihood  
855 phylogeny was then estimated using IQ-TREE v1.6.12, with automatic model selection  
856 (VT+F+I+G4) [136,137]. Branching support was assessed using SH-aLRT and ultrafast  
857 bootstrap sampling (‘-alrt 1000 -bb 5000’) [138,139].

858  
859 **Repeat annotation and TE dynamics.** TEs and other repeats were identified using the  
860 RepeatModeler and RepeatMasker pipelines. For each sample, a *de novo* repeat library was  
861 generated directly from the assembled nucleotides using RepeatModeler2 [140] and combined  
862 with a database of 12,662 protostome repeats from Repbase v23.08 [141] and 278 additional TEs  
863 manually curated from the *A. vaga* genome [44]. Repeats and TEs were then detected and  
864 classified using RepeatMasker v4.1.0 [84], and resultant outputs were post-processed using the  
865 ‘One code to find them all’ Perl script [142]. The breakdown of TE superfamilies in the final  
866 database was 4,145 DNA transposons (including 300 rolling circles), 5,523 LTRs, 2,583 LINEs  
867 (including SINEs), 227 PLEs, and 165 simple or low-complexity repeats. TE content (expressed  
868 as a proportion of genome size) was mapped onto the phylogeny using ‘contMap’ in the Phytools  
869 v0.6-99 package in R v3.6.0 [143,144]. There is no module for the detection of class II MITEs in  
870 RepeatMasker; for these, the separate program Generic Repeat Finder (GRF) was run using  
871 default parameters. TE dynamics were investigated by constructing Kimura 2-parameter  
872 divergence [85] landscapes using the utility scripts in the RepeatMasker package and plotted  
873 using custom scripts (see below). Selected assemblies were also submitted to the REPET v2.5  
874 ‘TEdenovo’ [145,146] TE detection and annotation pipeline with default parameters, for  
875 comparison. In addition, for *D. carnosus* and *R. sordida* (using 10x Genomics) reference  
876 assemblies, we increased the parameter ‘minNbSeqPerGroup’ from 3 to 5 to evaluate  
877 contribution from tetraploid genes, which was judged to be negligible. Although

878 REPET *denovo* TE consensus sequences are automatically classified using Wicker's TE  
879 classification [147], RepeatMasker was additionally applied for further TE classification,  
880 detection and landscape divergence plot building.

881  
882 The presence or absence of specific LTR retrotransposon (LTR-R) insertions in our population  
883 data was inferred using a read-mapping approach. Specifically, the presence of a given insertion  
884 was scored based on the alignment score of the 'best' read that mapped continuously and  
885 contiguously across the LTR-genome boundary. First, full-length LTR-Rs (i.e. those with  
886 annotated 5' and 3' LTR regions) were identified from each reference assembly using  
887 LTR\_retriever v2.8 [148]. Three filters were then applied to remove false positives. Candidates  
888 that showed an overlap with a predicted gene in the 5' or 3' LTR itself or an 'N' base within 150  
889 bases upstream or downstream of its genomic location that might indicate local mis-assembly  
890 were removed. Candidates also required supporting evidence of LTR homology from a separate  
891 RepeatMasker annotation of the reference assembly. For each remaining LTR-R, a library of  
892 'LTR-tags' was then generated by extracting a 100 bp sequence that spanned 50 bases into the  
893 genomic (i.e., non-TE) region of the insertion site from both the 5' and 3' terminal repeated  
894 regions. Thus, each pair of 'LTR-tags' represents an insertion of a particular LTR into a specific  
895 location in the focal genome, and a score is calculated based on the alignment information  
896 contained in the CIGAR string of the 'best' read (i.e. with the highest number of alignment  
897 matches) from the SAM mapping file:  $S_i = ((M_{Li} - X_{Li}) + (M_{Ri} - X_{Ri}))/200$ , where  $M_{Li}$  is the  
898 number of alignment matches for the left-hand tag for LTR  $i$ , penalised by the number of  
899 mismatches  $X_{Li}$ , with equivalent scoring for the right-hand tag. Since tag length is 100 bases, the  
900 maximum score for a perfect alignment is 200, or 1 after normalisation. The number of mapped  
901 reads is also recorded to provide an estimate of coverage (but note that  $S_i$  is taken from the best  
902 read only). Sequencing reads from all single-individual rotifer samples were aligned to the  
903 filtered LTR-tag set using BBTools 'bbmap' with the parameters 'minid=0.5 local=t' and scored  
904 using the above system. Because orthologous LTR-Rs may be identified from searches started in  
905 different genomes, we identified these cases by reconstructing the phylogeny of the LTR-tags  
906 and any with pairwise sequence divergence less than 0.1 were collapsed to yield a condensed  
907 final matrix.

908  
909 The LTR-tag case-study in Fig. 4b was selected for closer investigation in the draft assemblies  
910 after consideration of several examples, because it illustrates variability for an element insertion  
911 site within a species and indicates that Class I TEs can insert in coding regions, with potential  
912 fitness consequences. The LTR-tags were mapped to the RM15 draft assembly using Geneious  
913 Prime v2020.1.2 [135], and were found to match an element annotated by LTR\_retriever,  
914 containing four predicted genes. In the RM9 draft assembly, only the left-hand tag was mapped,  
915 as the scaffold ended before the inserted element was fully assembled. For the same reason, the  
916 element in RM9 had not been annotated as such by LTR\_retriever, but the sequence is nearly  
917 identical (99.7%) to the insertion in RM15 along its aligned length (except that the annotations  
918 predicted three element-associated genes rather than four). The scaffolds were trimmed to the  
919 focal gene and aligned, and the region was used as a BLASTn query against local databases for  
920 two other *R. magnacalcarata* reference genomes where the LTR-tag was absent: MAG1 and  
921 Rg2018. In each case, this provided the location of a closely similar but uninterrupted copy of  
922 the focal gene, although the annotations of the gene's structure differed slightly among genomes.  
923 These scaffolds were trimmed and aligned against the copies from RM9 and RM15, using the  
924 Geneious alignment tool with default settings, except that the gap extension penalty was reduced  
925 from 3 to 0.2 to enable the algorithm to handle the element insertion. Local features were  
926 manually reannotated to illustrate the interpretation provided in the text. To investigate the  
927 potential function of the interrupted gene, the copy from MAG1 (g37061) was translated and

928 used as a BLASTp query against the NCBI RefSeq Protein Database [149]. A region of  
929 approximately 1000 residues was found to have weak similarity (~25% pairwise identity) to  
930 proteins annotated as midasins, from a range of eukaryotes. As a final step, the intact gene from  
931 MAG1 was used as a BLASTn query against the full draft genomes of RM9 and RM15, which  
932 revealed a separate scaffold in each case, containing a partial copy of the gene in which the  
933 coding sequence was intact across the junction spanned by the LTR-tag, and the element  
934 insertion was absent.

935  
936 **Recombination analyses.** We tested sexual versus clonal patterns of variation in LTR presence  
937 and absences. First, we calculated consistency indices (CI) with parsimony reconstruction of the  
938 binary matrix. LTR-tags with scores  $> 0.875$  were coded as present (i.e. no more than half of the  
939 genome context or LTR region from both left and right LTR-tags was missing) and  $< 0.875$   
940 coded as absent (alternative thresholds led to the same qualitative results). A CI = 1 indicates  
941 perfect nesting with no homoplasy, whereas a score less than 1 is expected if variation is shuffled  
942 among loci and not tree-like. Next, we calculated the index of association and ran permutations  
943 to test for significant linkage disequilibrium of the LTR-tag data relative to a null model of  
944 random shuffling (expected in a fully outcrossing sexual population). We used the modified  
945 index of association by Agapow and Burt (2001) [150] that corrects for an effect of the number  
946 of loci on the index, and ran permutations using the ‘ia’ function in the Poppr v2.8.5 library  
947 [151] in R. Data were coded as diploid and codominant presence/absence data (because of the  
948 lack of diploid assemblies in the population-level data). Finally, for *R. magnacalcarata* and *R.*  
949 *socialis* we ran simulations with the FacSexCoalescent simulator of Hartfield et al. (2018) [152]  
950 to generate 50000 datasets with the same number of individuals and sampled binary loci as  
951 observed, but with frequencies of sexual versus asexual reproduction within the populations  
952 varying from  $10^{-7}$  (i.e. negligible) to 1 (i.e. obligate sexual). We estimate the posterior  
953 distribution of the frequency of sex for our observed samples using Approximate Bayesian  
954 Computation on the simulated datasets implemented in the abc package in R.

955  
956 **Reverse transcriptase survey.** A hidden Markov model (HMM) approach was used to survey  
957 the predicted rotifer proteomes for proteins encoding the reverse transcriptase (RT) domain  
958 (Pfam ID PF00078). First, a HMM was constructed from an alignment of 51 RT domains from  
959 across the tree of life [57], supplemented with 67 bdelloid-specific retroelements  
960 [44,57,58,61,63,64] (S9 Fig). Alternative transcripts were first removed from predicted  
961 proteomes and proteins with a significant match ( $E$ -value  $\leq 1e-5$ ) were identified and inserted  
962 into the core RT alignment using HMMER v3.2.1 ‘hmmsearch’ and ‘hmmalign’, respectively  
963 (<http://hmmmer.org/>). Maximum likelihood phylogenies were then constructed using IQ-TREE as  
964 above, specifying the root of the phylogeny to be on the branch leading to the bacterial retrans  
965 [57]. Trees were manipulated using FigTree v1.4.4 (<https://github.com/rambaut/figtree>),  
966 colouring the identified RT-encoding rotifer proteins based on their phylogenetic position. The  
967 span accounted for by genome ‘features’ (other genes, other TEs and telomeric repeats) in a 25  
968 kb window around each identified RT-containing protein was summarised using BEDTools  
969 v2.29.2 ‘intersect’ and ‘groupby’ [153]. Other genes were counted as predicted coding regions  
970 that did not overlap with any TE annotation. Genomic locations of the telomeric hexamer  
971 ‘TGTGGG’ [58] were identified using EMBOSS ‘fuzznuc’ [154], excluding any hexamer that  
972 overlapped with a predicted CDS. Note that the telomeric repeat for *Brachionus* is not known,  
973 but the sequence above was among the most frequent G-rich hexamers identified in the PSC1  
974 genome (see S2 Note).

975  
976 **TE silencing machinery survey.** A similar HMM based approach was used to characterise gene  
977 copy evolution of three key pathways involved in RNAi gene-silencing. Putative Argonaute

978 proteins were identified based on the presence of both the PAZ and PIWI domains (Pfam IDs  
979 PF02170 and PF02171 respectively), putative Dicer proteins were identified based on the  
980 presence of both PAZ and Dicer (PF03368) domains, and putative RdRP proteins were identified  
981 based on the presence of the RdRP domain (PF05183). Stockholm files were downloaded from  
982 Pfam [155] and aligned to the proteomes using HMMER ( $E$ -value  $\leq 1e-5$ ) as above. Reference  
983 proteomes from a selection of eukaryotic species to represent the diversity and distribution of  
984 Argonaute, Dicer and RdRP proteins were downloaded (June 2020) from UniProt and subjected  
985 to the same procedure: *Arabidopsis thaliana* (UP000006548), *Oryza sativa* (UP000007015),  
986 *Neurospora crassa* (UP000001805), *Schizosaccharomyces pombe* (UP000002485), *Laccaria*  
987 *bicolor* (UP000001194), *Dictyostelium discoideum* (UP000002195), *D. melanogaster*  
988 (UP000000803), *C. elegans* (UP000001940), *H. exemplaris* (UP000192578), *H. robusta*  
989 (UP000015101), *L. gigantea* (UP000030746), *S. haematobium* (UP000054474), *B. plicatilis*  
990 (UP000276133), *Branchiostoma floridae* (UP000001554) and *Homo sapiens* UP000005640.  
991 Proteins were aligned using either ‘hmmalign’ from the HMMER package or Clustalo, and ML  
992 phylogenies were constructed using IQ-TREE as above.

993  
994 Comparative protein–domain abundance plots were constructed using counts of Pfam entries  
995 parsed directly from InterProScan5 [156] annotation of predicted proteomes. The ‘abundance  
996 score’ was computed as the (log) ratio of domain counts in bdelloids divided by the domain  
997 counts in eukaryotes, corrected for inflation in bdelloids due to the ancient whole-genome  
998 duplication by dividing the former by two. This correction is likely to be conservative, since  
999 many loci have lost one branch of the ancient duplication (i.e. tetraploidy is degenerate). To  
1000 check that the putative RdRP expansion was indeed eukaryotic in origin, rather than viral, the  
1001 HMMs for four viral RdRP families (PF00680, PF00978, PF00998 and PF02123) were  
1002 downloaded from Pfam and submitted to the same search protocol, with zero hits to bdelloid  
1003 proteomes recorded.

1004  
1005 **Statistical analyses.** To assess differences in TE content between desiccating and non-  
1006 desiccating rotifer species, we ran Bayesian linear mixed-effects models of TE content (as a  
1007 percentage of genome span) including desiccation as a two-level fixed factor and sample ID as a  
1008 random intercept term. The BUSCO gene phylogeny was used to account for non-independence  
1009 among species. A separate model was run for each TE superfamily (including ‘unclassified’ TEs)  
1010 as well as for all TEs combined. Inverse-Wishart priors were used for the random and residual  
1011 variances, and models were run for 42,000 iterations with a burn-in of 20,000 and a thinning  
1012 interval of 200. This resulted in 2,000 stored samples of the posterior with minimal  
1013 autocorrelation in all cases ( $< 0.2$ ) [157]. Models were run using the MCMCglmm v2.29 [158]  
1014 package in R. The phylogenetic signal, defined as the proportion of the total variance in TE  
1015 content attributable to the phylogeny [159], was estimated from the MCMCglmm model output  
1016 using the formula:  $\lambda = \sigma P^2 / (\sigma P^2 + \sigma R^2)$ .

1017  
1018 The density of genomic features surrounding BUSCO genes versus RT-containing genes were  
1019 compared using linear mixed effects models with species as a random effect and gene class  
1020 (BUSCO, PLE, LINE or LTR) as a fixed effect, run using lme4 [160] v1.1-21 in R. TE length  
1021 distributions were compared using the same approach, with species as a random effect and  
1022 binary factors specifying monogononts versus bdelloid, and desiccating versus nondesiccating  
1023 species.

1024  
1025 **Code availability.** All TE analysis scripts used in this study are available at  
1026 <https://github.com/reubwn/te-evolution>.

1027



1028  
1029  
1030  
1031  
1032  
1033  
1034  
1035  
1036  
1037  
1038  
1039  
1040  
1041  
1042  
1043  
1044  
1045  
1046  
1047  
1048  
1049  
1050  
1051  
1052  
1053  
1054  
1055  
1056  
1057  
1058  
1059  
1060  
1061  
1062  
1063  
1064  
1065  
1066  
1067  
1068  
1069  
1070  
1071  
1072  
1073  
1074  
1075  
1076  
1077  
1078  
1079  
1080  
1081  
1082  
1083  
1084

## Acknowledgements

Genome sequencing was performed by the UK Natural Environment Research Council (NERC) Biomolecular Analysis Facility at the Centre for Genomic Research (CGR) at the University of Liverpool (NBAF-Liverpool) and the DNA Sequencing Facility in the Biochemistry Department at the University of Cambridge. The authors wish to thank the following: Christiane Hertz-Fowler, Pia Koldkjær and John Kenny (CGR), Shilo Dickens and Nataliya Scott (Cambridge). Matthew Arno and Colin Sharp (Edinburgh), and Steven Van Belleghem (University of Puerto Rico) for support with the planning and execution of various aspects of genome sequencing and/or assembly, Tom Smith and Anita Kristiansen for rotifer sampling, and Mike Tristem for helpful discussions on detecting LTR polymorphisms.

## References

1. Orgel LE, Crick FH. Selfish DNA: the ultimate parasite. *Nature*. 1980;284: 604–607. doi:10.1038/284604a0
2. Hickey DA. Selfish DNA: a sexually-transmitted nuclear parasite. *Genetics*. 1982;101: 519–531.
3. Charlesworth B, Charlesworth D. The population dynamics of transposable elements. *Genet Res*. 1983;42: 1–27. doi:10.1017/S0016672300021455
4. Doolittle RF, Feng D-F, Johnson MS, McClure MA. Origins and evolutionary relationships of retroviruses. *Q Rev Biol*. 1989;64: 1–30.
5. Eickbush TH, Malik HS. Origins and Evolution of Retrotransposons. In: Craig NL, Lambowitz AM, Craigie R, Gellert M, editors. *Mobile DNA II*. American Society of Microbiology; 2002. pp. 1111–1144. doi:10.1128/9781555817954.ch49
6. Robertson HM. Evolution of DNA Transposons in Eukaryotes. In: Craig NL, Lambowitz AM, Craigie R, Gellert M, editors. *Mobile DNA II*. American Society of Microbiology; 2002. pp. 1093–1110. doi:10.1128/9781555817954.ch48
7. Capy P, Gasperi G, Biémont C, Bazin C. Stress and transposable elements: co-evolution or useful parasites? *Heredity*. 2000;85 (Pt 2): 101–106. doi:10.1046/j.1365-2540.2000.00751.x
8. Burt A, Trivers R. *Genes in Conflict: The Biology of Selfish Genetic Elements*. Harvard University Press; 2009.
9. Bourgeois Y, Boissinot S. On the Population Dynamics of Junk: A Review on the Population Genomics of Transposable Elements. *Genes*. 2019;10. doi:10.3390/genes10060419
10. Finnegan DJ. Transposable elements. *Curr Opin Genet Dev*. 1992;2: 861–867.
11. Nuzhdin SV. Sure facts, speculations, and open questions about the evolution of transposable element copy number. *Genetica*. 1999;107: 129–137.
12. Montgomery E, Charlesworth B, Langley CH. A test for the role of natural selection in the stabilization of transposable element copy number in a population of *Drosophila melanogaster*. *Genet Res*. 1987;49: 31–41. doi:10.1017/s0016672308009634
13. Langley CH, Montgomery E, Hudson R, Kaplan N, Charlesworth B. On the role of unequal exchange in the containment of transposable element copy number. *Genet Res*. 1988;52: 223–235. doi:10.1017/s0016672300027695
14. Lander ES, Linton LM, Birren B, Nusbaum C, Zody MC, Baldwin J, et al. Initial sequencing and analysis of the human genome. *Nature*. 2001;409: 860–921. doi:10.1038/35057062
15. Craig NL. A Moveable Feast: An Introduction to Mobile DNA. In: Craig NL, Chandler M, Gellert M, Lambowitz AM, Rice PA, Sandmeyer S, editors. *Mobile DNA III*. American Society of Microbiology; 2015. pp. 3–39. doi:10.1128/microbiolspec.MDNA3-0062-2014
16. Chalopin D, Naville M, Plard F, Galiana D, Volff J-N. Comparative analysis of transposable elements highlights mobilome diversity and evolution in vertebrates. *Genome Biol Evol*. 2015;7: 567–580. doi:10.1093/gbe/evv005
17. Petersen M, Armisen D, Gibbs RA, Hering L, Khila A, Mayer G, et al. Diversity and evolution of the transposable element repertoire in arthropods with particular reference to insects. *BMC Evol Biol*. 2019;19: 11. doi:10.1186/s12862-018-1324-9
18. Szitenberg A, Cha S, Opperman CH, Bird DM, Blaxter ML, Lunt DH. Genetic drift, not life history or RNAi, determine long-term evolution of transposable elements. *Genome Biol Evol*. 2016;8: 2964–2978. doi:10.1093/gbe/evw208



- 1085 19. Castanera R, López-Varas L, Borgognone A, LaButti K, Lapidus A, Schmutz J, et al. Transposable elements  
1086 versus the fungal genome: Impact on whole-genome architecture and transcriptional profiles. *PLoS Genet.*  
1087 2016;12: e1006108. doi:10.1371/journal.pgen.1006108
- 1088 20. Doolittle WF, Sapienza C. Selfish genes, the phenotype paradigm and genome evolution. *Nature.* 1980;284:  
1089 601–603. doi:10.1038/284601a0
- 1090 21. Charlesworth B, Langley CH. The population genetics of *Drosophila* transposable elements. *Annu Rev Genet.*  
1091 1989;23: 251–287. doi:10.1146/annurev.ge.23.120189.001343
- 1092 22. Wright S, Finnegan D. Genome evolution: sex and the transposable element. *Curr Biol.* 2001;11: R296-9.  
1093 doi:10.1016/S0960-9822(01)00168-3
- 1094 23. Schaack S, Choi E, Lynch M, Pritham EJ. DNA transposons and the role of recombination in mutation  
1095 accumulation in *Daphnia pulex*. *Genome Biol.* 2010;11: R46. doi:10.1186/gb-2010-11-4-r46
- 1096 24. Petrov DA, Aminetzach YT, Davis JC, Bensasson D, Hirsh AE. Size matters: non-LTR retrotransposable  
1097 elements and ectopic recombination in *Drosophila*. *Mol Biol Evol.* 2003;20: 880–892.  
1098 doi:10.1093/molbev/msg102
- 1099 25. Schwander T, Crespi BJ. Twigs on the tree of life? Neutral and selective models for integrating  
1100 macroevolutionary patterns with microevolutionary processes in the analysis of asexuality. *Mol Ecol.* 2009;18:  
1101 28–42. doi:10.1111/j.1365-294X.2008.03992.x
- 1102 26. Charlesworth B, Langley CH. The evolution of self-regulated transposition of transposable elements.  
1103 *Genetics.* 1986;112: 359–383.
- 1104 27. Dolgin ES, Charlesworth B. The fate of transposable elements in asexual populations. *Genetics.* 2006;174:  
1105 817–827. doi:10.1534/genetics.106.060434
- 1106 28. Bast J, Jaron KS, Schuseil D, Roze D, Schwander T. Asexual reproduction reduces transposable element load  
1107 in experimental yeast populations. *Elife.* 2019;8. doi:10.7554/eLife.48548
- 1108 29. Fujita MK, Singhal S, Brunet TO, Maldonado JA. Evolutionary Dynamics and Consequences of  
1109 Parthenogenesis in Vertebrates. *Annu Rev Ecol Evol Syst.* 2020. doi:10.1146/annurev-ecolsys-011720-  
1110 114900
- 1111 30. Schaack S, Gilbert C, Feschotte C. Promiscuous DNA: horizontal transfer of transposable elements and why it  
1112 matters for eukaryotic evolution. *Trends Ecol Evol.* 2010;25: 537–546. doi:10.1016/j.tree.2010.06.001
- 1113 31. Basten CJ, Moody ME. A branching-process model for the evolution of transposable elements incorporating  
1114 selection. *J Math Biol.* 1991;29: 743–761. doi:10.1007/bf00160190
- 1115 32. Edwards RJ, Brookfield JFY. Transiently beneficial insertions could maintain mobile DNA sequences in  
1116 variable environments. *Mol Biol Evol.* 2003;20: 30–37. doi:10.1093/molbev/msg001
- 1117 33. Silva JC, Loreto EL, Clark JB. Factors that affect the horizontal transfer of transposable elements. *Curr Issues*  
1118 *Mol Biol.* 2004;6: 57–71.
- 1119 34. Peccoud J, Loiseau V, Cordaux R, Gilbert C. Massive horizontal transfer of transposable elements in insects.  
1120 *Proc Natl Acad Sci U S A.* 2017. doi:10.1073/pnas.1621178114
- 1121 35. Boutin TS, Le Rouzic A, Capy P. How does selfing affect the dynamics of selfish transposable elements? *Mob*  
1122 *DNA.* 2012;3: 5. doi:10.1186/1759-8753-3-5
- 1123 36. Startek M, Le Rouzic A, Capy P, Grzebelus D, Gambin A. Genomic parasites or symbionts? Modeling the  
1124 effects of environmental pressure on transposition activity in asexual populations. *Theor Popul Biol.* 2013;90:  
1125 145–151. doi:10.1016/j.tpb.2013.07.004
- 1126 37. Neiman M, Meirmans S, Meirmans PG. What can asexual lineage age tell us about the maintenance of sex?  
1127 *Ann N Y Acad Sci.* 2009;1168: 185–200. doi:10.1111/j.1749-6632.2009.04572.x
- 1128 38. Jaron KS, Bast J, Nowell RW, Rhyker Ranallo-Benavidez T, Robinson-Rechavi M, Schwander T. Genomic  
1129 features of asexual animals. *bioRxiv.* 2019. p. 497495. doi:10.1101/497495
- 1130 39. Mark Welch DB, Ricci C, Meselson M. Bdelloid Rotifers: Progress in Understanding the Success of an  
1131 Evolutionary Scandal. *Lost Sex.* Springer, Dordrecht; 2009. pp. 259–279. doi:10.1007/978-90-481-2770-2\_13
- 1132 40. Robeson MS, King AJ, Freeman KR, Birky CW Jr, Martin AP, Schmidt SK. Soil rotifer communities are  
1133 extremely diverse globally but spatially autocorrelated locally. *Proc Natl Acad Sci U S A.* 2011;108: 4406–  
1134 4410. doi:10.1073/pnas.1012678108
- 1135 41. Hudson CT, Gosse PH. The Rotifera or wheel-animalcules. Longmans, Green; 1886.
- 1136 42. Donner J. Ordnung Bdelloidea. Akademie Verlag, Berlin; 1965. p. 297.
- 1137 43. Mark Welch D, Meselson M. Evidence for the evolution of bdelloid rotifers without sexual reproduction or  
1138 genetic exchange. *Science.* 2000;288: 1211–1215. doi:10.1126/science.288.5469.1211
- 1139 44. Flot J-F, Hespeels B, Li X, Noel B, Arkhipova I, Danchin EGJ, et al. Genomic evidence for ameiotic  
1140 evolution in the bdelloid rotifer *Adineta vaga*. *Nature.* 2013;500: 453–457. doi:10.1038/nature12326
- 1141 45. Mark Welch DB, Mark Welch JL, Meselson M. Evidence for degenerate tetraploidy in bdelloid rotifers. *Proc*  
1142 *Natl Acad Sci U S A.* 2008;105: 5145–5149. doi:10.1073/pnas.0800972105
- 1143 46. Nowell RW, Almeida P, Wilson CG, Smith TP, Fontaneto D, Crisp A, et al. Comparative genomics of  
1144 bdelloid rotifers: Insights from desiccating and nondesiccating species. *PLoS Biol.* 2018;16: e2004830.

- 1145 doi:10.1371/journal.pbio.2004830  
1146 47. Simion P, Narayan J, Houtain A, Derzelle A, Baudry L, Nicolas E, et al. Homologous chromosomes in  
1147 asexual rotifer *Adineta vaga* suggest automixis. bioRxiv. 2020. p. 2020.06.16.155473.  
1148 doi:10.1101/2020.06.16.155473  
1149 48. Signorovitch A, Hur J, Gladyshev E, Meselson M. Allele sharing and evidence for sexuality in a  
1150 mitochondrial clade of bdelloid rotifers. Genetics. 2015;200: 581–590. doi:10.1534/genetics.115.176719  
1151 49. Vakhrusheva OA, Mnatsakanova EA, Galimov YR, Neretina TV, Gerasimov ES, Ozerova SG, et al.  
1152 Recombination in a natural population of the bdelloid rotifer *Adineta vaga*. bioRxiv. 2018. p. 489393.  
1153 doi:10.1101/489393  
1154 50. Arkhipova I, Meselson M. Transposable elements in sexual and ancient asexual taxa. Proc Natl Acad Sci U S  
1155 A. 2000;97: 14473–14477. doi:10.1073/pnas.97.26.14473  
1156 51. Zhang H-H, Peccoud J, Xu M-R-X, Zhang X-G, Gilbert C. Horizontal transfer and evolution of transposable  
1157 elements in vertebrates. Nat Commun. 2020;11: 1362. doi:10.1038/s41467-020-15149-4  
1158 52. Arkhipova I, Meselson M. Deleterious transposable elements and the extinction of asexuals. Bioessays.  
1159 2005;27: 76–85. doi:10.1002/bies.20159  
1160 53. Ricci C. Anhydrobiotic capabilities of bdelloid rotifers. Hydrobiologia. 1998;387–388: 321–326.  
1161 doi:10.1023/A:1017086425934  
1162 54. Gladyshev E, Meselson M. Extreme resistance of bdelloid rotifers to ionizing radiation. Proc Natl Acad Sci U  
1163 S A. 2008;105: 5139–5144. doi:10.1073/pnas.0800966105  
1164 55. Hespeels B, Knapen M, Hanot-Mambres D, Heuskin A-C, Pineux F, Lucas S, et al. Gateway to genetic  
1165 exchange? DNA double-strand breaks in the bdelloid rotifer *Adineta vaga* submitted to desiccation. J Evol  
1166 Biol. 2014;27: 1334–1345. doi:10.1111/jeb.12326  
1167 56. Gladyshev EA, Arkhipova IR. Genome structure of bdelloid rotifers: shaped by asexuality or desiccation? J  
1168 Hered. 2010;101 Suppl 1: S85-93. doi:10.1093/jhered/esq008  
1169 57. Arkhipova IR, Pyatkov KI, Meselson M, Evgen'ev MB. Retroelements containing introns in diverse  
1170 invertebrate taxa. Nat Genet. 2003;33: 123–124. doi:10.1038/ng1074  
1171 58. Gladyshev EA, Arkhipova IR. Telomere-associated endonuclease-deficient *Penelope*-like retroelements in  
1172 diverse eukaryotes. Proc Natl Acad Sci U S A. 2007;104: 9352–9357. doi:10.1073/pnas.0702741104  
1173 59. Arkhipova IR, Yushenova IA, Rodriguez F. Giant reverse transcriptase-encoding transposable elements at  
1174 telomeres. Mol Biol Evol. 2017. doi:10.1093/molbev/msx159  
1175 60. Arkhipova IR, Yushenova IA, Rodriguez F. Endonuclease-containing *Penelope* retrotransposons in the  
1176 bdelloid rotifer *Adineta vaga* exhibit unusual structural features and play a role in expansion of host gene  
1177 families. Mob DNA. 2013;4: 19. doi:10.1186/1759-8753-4-19  
1178 61. Gladyshev EA, Meselson M, Arkhipova IR. A deep-branching clade of retrovirus-like retrotransposons in  
1179 bdelloid rotifers. Gene. 2007;390: 136–145. doi:10.1016/j.gene.2006.09.025  
1180 62. Rodriguez F, Kenefick AW, Arkhipova IR. LTR-retrotransposons from bdelloid rotifers capture additional  
1181 ORFs shared between highly diverse retroelement types. Viruses. 2017;9. doi:10.3390/v9040078  
1182 63. Gladyshev EA, Arkhipova IR. Rotifer rDNA-specific R9 retrotransposable elements generate an exceptionally  
1183 long target site duplication upon insertion. Gene. 2009;448: 145–150. doi:10.1016/j.gene.2009.08.016  
1184 64. Gladyshev EA, Arkhipova IR. A subtelomeric non-LTR retrotransposon *Hebe* in the bdelloid rotifer *Adineta*  
1185 *vaga* is subject to inactivation by deletions but not 5' truncations. Mob DNA. 2010;1: 12. doi:10.1186/1759-  
1186 8753-1-12  
1187 65. Kim H-S, Lee B-Y, Han J, Jeong C-B, Hwang D-S, Lee M-C, et al. The genome of the freshwater  
1188 monogonont rotifer *Brachionus calyciflorus*. Mol Ecol Resour. 2018;18: 646–655. doi:10.1111/1755-  
1189 0998.12768  
1190 66. Han J, Park JC, Choi B-S, Kim M-S, Kim H-S, Hagiwara A, et al. The genome of the marine monogonont  
1191 rotifer *Brachionus plicatilis*: Genome-wide expression profiles of 28 cytochrome P450 genes in response to  
1192 chlorpyrifos and 2-ethyl-phenanthrene. Aquat Toxicol. 2019;214: 105230. doi:10.1016/j.aquatox.2019.105230  
1193 67. Blommaert J, Riss S, Hecox-Lea B, Mark Welch DB, Stelzer CP. Small, but surprisingly repetitive genomes:  
1194 transposon expansion and not polyploidy has driven a doubling in genome size in a metazoan species  
1195 complex. BMC Genomics. 2019;20: 466. doi:10.1186/s12864-019-5859-y  
1196 68. Mauer K, Hellmann SL, Groth M, Fröbuis AC, Zischler H, Hankeln T, et al. The genome, transcriptome, and  
1197 proteome of the fish parasite *Pomphorhynchus laevis* (Acanthocephala). PLoS One. 2020;15: e0232973.  
1198 doi:10.1371/journal.pone.0232973  
1199 69. Wey-Fabrizius AR, Herlyn H, Rieger B, Rosenkranz D, Witek A, Welch DBM, et al. Transcriptome data  
1200 reveal Syndermatan relationships and suggest the evolution of endoparasitism in Acanthocephala via an  
1201 epizoic stage. PLoS One. 2014;9: e88618. doi:10.1371/journal.pone.0088618  
1202 70. Sielaff M, Schmidt H, Struck TH, Rosenkranz D, Mark Welch DB, Hankeln T, et al. Phylogeny of  
1203 Syndermata (syn. Rotifera): Mitochondrial gene order verifies epizoic Seisonidea as sister to endoparasitic  
1204 Acanthocephala within monophyletic Hemirotifera. Mol Phylogenet Evol. 2016;96: 79–92.

- 1205 doi:10.1016/j.ympcv.2015.11.017
- 1206 71. Laumer CE, Fernández R, Lemer S, Combosch D, Kocot KM, Riesgo A, et al. Revisiting metazoan phylogeny  
1207 with genomic sampling of all phyla. *Proc Biol Sci.* 2019;286: 20190831. doi:10.1098/rspb.2019.0831
- 1208 72. *C. elegans* Sequencing Consortium. Genome sequence of the nematode *C. elegans*: a platform for  
1209 investigating biology. *Science.* 1998;282: 2012–2018. doi:10.1126/science.282.5396.2012
- 1210 73. Adams MD, Celniker SE, Holt RA, Evans CA, Gocayne JD, Amanatides PG, et al. The genome sequence of  
1211 *Drosophila melanogaster*. *Science.* 2000;287: 2185–2195. doi:10.1126/science.287.5461.2185
- 1212 74. Young ND, Jex AR, Li B, Liu S, Yang L, Xiong Z, et al. Whole-genome sequence of *Schistosoma*  
1213 *haematobium*. *Nat Genet.* 2012;44: 221–225. doi:10.1038/ng.1065
- 1214 75. Zhang G, Fang X, Guo X, Li L, Luo R, Xu F, et al. The oyster genome reveals stress adaptation and  
1215 complexity of shell formation. *Nature.* 2012;490: 49–54. doi:10.1038/nature11413
- 1216 76. Simakov O, Marletaz F, Cho S-J, Edsinger-Gonzales E, Havlak P, Hellsten U, et al. Insights into bilaterian  
1217 evolution from three spiralian genomes. *Nature.* 2013;493: 526–531. doi:10.1038/nature11696
- 1218 77. Gusev O, Suetsugu Y, Cornette R, Kawashima T, Logacheva MD, Kondrashov AS, et al. Comparative  
1219 genome sequencing reveals genomic signature of extreme desiccation tolerance in the anhydrobiotic midge.  
1220 *Nat Commun.* 2014;5: 4784. doi:10.1038/ncomms5784
- 1221 78. Albertin CB, Simakov O, Mitros T, Wang ZY, Pungor JR, Edsinger-Gonzales E, et al. The octopus genome  
1222 and the evolution of cephalopod neural and morphological novelties. *Nature.* 2015;524: 220–224.  
1223 doi:10.1038/nature14668
- 1224 79. Luo Y-J, Takeuchi T, Koyanagi R, Yamada L, Kanda M, Khalturina M, et al. The *Lingula* genome provides  
1225 insights into brachiopod evolution and the origin of phosphate biomineralization. *Nat Commun.* 2015;6: 8301.  
1226 doi:10.1038/ncomms9301
- 1227 80. Mikhailov KV, Slyusarev GS, Nikitin MA, Logacheva MD, Penin AA, Aleoshin VV, et al. The genome of  
1228 *Intoshia linei* affirms orthonectids as highly simplified spiralian. *Curr Biol.* 2016;26: 1768–1774.  
1229 doi:10.1016/j.cub.2016.05.007
- 1230 81. Hashimoto T, Horikawa DD, Saito Y, Kuwahara H, Kozuka-Hata H, Shin-I T, et al. Extremotolerant  
1231 tardigrade genome and improved radiotolerance of human cultured cells by tardigrade-unique protein. *Nat*  
1232 *Commun.* 2016;7: 12808. doi:10.1038/ncomms12808
- 1233 82. Yoshida Y, Koutsovoulos G, Laetsch DR, Stevens L, Kumar S, Horikawa DD, et al. Comparative genomics of  
1234 the tardigrades *Hypsibius dujardini* and *Ramazzottius varieornatus*. *PLoS Biol.* 2017;15: e2002266.  
1235 doi:10.1371/journal.pbio.2002266
- 1236 83. Adema CM, Hillier LW, Jones CS, Loker ES, Knight M, Minx P, et al. Whole genome analysis of a  
1237 schistosomiasis-transmitting freshwater snail. *Nat Commun.* 2017;8: 15451. doi:10.1038/ncomms15451
- 1238 84. Smit AFA, Hubley R, Green P. RepeatMasker Open-4.0. 2013-2015. Available: <http://www.repeatmasker.org>
- 1239 85. Kimura M. A simple method for estimating evolutionary rates of base substitutions through comparative  
1240 studies of nucleotide sequences. *J Mol Evol.* 1980;16: 111–120. doi:10.1007/BF01731581
- 1241 86. Kapusta A, Suh A. Evolution of bird genomes—a transposon’s-eye view. *Ann N Y Acad Sci.* 2017;1389: 164–  
1242 185. doi:10.1111/nyas.13295
- 1243 87. Shao F, Han M, Peng Z. Evolution and diversity of transposable elements in fish genomes. *Sci Rep.* 2019;9:  
1244 15399. doi:10.1038/s41598-019-51888-1
- 1245 88. Belshaw R, Pereira V, Katzourakis A, Talbot G, Paces J, Burt A, et al. Long-term reinfection of the human  
1246 genome by endogenous retroviruses. *Proc Natl Acad Sci U S A.* 2004;101: 4894–4899.  
1247 doi:10.1073/pnas.0307800101
- 1248 89. Garbarino JE, Gibbons IR. Expression and genomic analysis of midasin, a novel and highly conserved AAA  
1249 protein distantly related to dynein. *BMC Genomics.* 2002;3: 18. doi:10.1186/1471-2164-3-18
- 1250 90. Li P-C, Li K, Wang J, Zhao C-Z, Zhao S-Z, Hou L, et al. The AAA-ATPase MIDASIN 1 functions in  
1251 ribosome biogenesis and is essential for embryo and root development. *Plant Physiol.* 2019;180: 289–304.  
1252 doi:10.1104/pp.18.01225
- 1253 91. Hur JH, Van Doninck K, Mandigo ML, Meselson M. Degenerate tetraploidy was established before bdelloid  
1254 rotifer families diverged. *Mol Biol Evol.* 2009;26: 375–383. doi:10.1093/molbev/msn260
- 1255 92. Eyres I, Frangedakis E, Fontaneto D, Hermiou EA, Boschetti C, Carr A, et al. Multiple functionally divergent  
1256 and conserved copies of alpha tubulin in bdelloid rotifers. *BMC Evol Biol.* 2012;12: 148. doi:10.1186/1471-  
1257 2148-12-148
- 1258 93. Song M, Boissinot S. Selection against LINE-1 retrotransposons results principally from their ability to  
1259 mediate ectopic recombination. *Gene.* 2007;390: 206–213. doi:10.1016/j.gene.2006.09.033
- 1260 94. Arkhipova IR, Yushenova IA. Giant transposons in eukaryotes: Is bigger better? *Genome Biol Evol.* 2019;11:  
1261 906–918. doi:10.1093/gbe/evz041
- 1262 95. Cooper DM, Schimenti KJ, Schimenti JC. Factors affecting ectopic gene conversion in mice. *Mamm Genome.*  
1263 1998;9: 355–360. doi:10.1007/s003359900769
- 1264 96. Höck J, Meister G. The Argonaute protein family. *Genome Biol.* 2008;9: 210. doi:10.1186/gb-2008-9-2-210



- 1265 97. Juliano C, Wang J, Lin H. Uniting germline and stem cells: the function of Piwi proteins and the piRNA  
1266 pathway in diverse organisms. *Annu Rev Genet.* 2011;45: 447–469. doi:10.1146/annurev-genet-110410-  
1267 132541
- 1268 98. Ghildiyal M, Zamore PD. Small silencing RNAs: an expanding universe. *Nat Rev Genet.* 2009;10: 94–108.  
1269 doi:10.1038/nrg2504
- 1270 99. de Jong D, Eitel M, Jakob W, Osigus H-J, Hadrys H, Desalle R, et al. Multiple dicer genes in the early-  
1271 diverging metazoa. *Mol Biol Evol.* 2009;26: 1333–1340. doi:10.1093/molbev/msp042
- 1272 100. Zong J, Yao X, Yin J, Zhang D, Ma H. Evolution of the RNA-dependent RNA polymerase (RdRP) genes:  
1273 duplications and possible losses before and after the divergence of major eukaryotic groups. *Gene.* 2009;447:  
1274 29–39. doi:10.1016/j.gene.2009.07.004
- 1275 101. Yigit E, Batista PJ, Bei Y, Pang KM, Chen C-CG, Tolia NH, et al. Analysis of the *C. elegans* Argonaute  
1276 family reveals that distinct Argonautes act sequentially during RNAi. *Cell.* 2006;127: 747–757.  
1277 doi:10.1016/j.cell.2006.09.033
- 1278 102. Shi Z, Montgomery TA, Qi Y, Ruvkun G. High-throughput sequencing reveals extraordinary fluidity of  
1279 miRNA, piRNA, and siRNA pathways in nematodes. *Genome Res.* 2013;23: 497–508.  
1280 doi:10.1101/gr.149112.112
- 1281 103. Buck AH, Blaxter M. Functional diversification of Argonautes in nematodes: an expanding universe. *Biochem*  
1282 *Soc Trans.* 2013;41: 881–886. doi:10.1042/BST20130086
- 1283 104. Aravin AA, Hannon GJ, Brennecke J. The Piwi-piRNA pathway provides an adaptive defense in the  
1284 transposon arms race. *Science.* 2007;318: 761–764. doi:10.1126/science.1146484
- 1285 105. Sarkies P, Selkirk ME, Jones JT, Blok V, Boothby T, Goldstein B, et al. Ancient and novel small RNA  
1286 pathways compensate for the loss of piRNAs in multiple independent nematode lineages. *PLoS Biol.* 2015;13:  
1287 e1002061. doi:10.1371/journal.pbio.1002061
- 1288 106. Shirayama M, Seth M, Lee H-C, Gu W, Ishidate T, Conte D Jr, et al. piRNAs initiate an epigenetic memory of  
1289 nonself RNA in the *C. elegans* germline. *Cell.* 2012;150: 65–77. doi:10.1016/j.cell.2012.06.015
- 1290 107. Rodriguez F, Arkhipova IR. Multitasking of the piRNA silencing machinery: targeting transposable elements  
1291 and foreign genes in the bdelloid rotifer *Adineta vaga*. *Genetics.* 2016;203: 255–268.  
1292 doi:10.1534/genetics.116.186734
- 1293 108. Gladyshev EA, Meselson M, Arkhipova IR. Massive horizontal gene transfer in bdelloid rotifers. *Science.*  
1294 2008;320: 1210–1213. doi:10.1126/science.1156407
- 1295 109. Boschetti C, Carr A, Crisp A, Eyres I, Wang-Koh Y, Lubzens E, et al. Biochemical diversification through  
1296 foreign gene expression in bdelloid rotifers. *PLoS Genet.* 2012;8: e1003035.  
1297 doi:10.1371/journal.pgen.1003035
- 1298 110. Eyres I, Boschetti C, Crisp A, Smith TP, Fontaneto D, Tunnacliffe A, et al. Horizontal gene transfer in  
1299 bdelloid rotifers is ancient, ongoing and more frequent in species from desiccating habitats. *BMC Biol.*  
1300 2015;13: 90. doi:10.1186/s12915-015-0202-9
- 1301 111. Becks L, Agrawal AF. The effect of sex on the mean and variance of fitness in facultatively sexual rotifers. *J*  
1302 *Evol Biol.* 2011;24: 656–664. doi:10.1111/j.1420-9101.2010.02199.x
- 1303 112. Andrews S. FastQC: A quality-control tool for high-throughput sequence data. 2015. Available:  
1304 <http://www.bioinformatics.babraham.ac.uk/projects/fastqc/>
- 1305 113. Ewels P, Magnusson M, Lundin S, Källner M. MultiQC: summarize analysis results for multiple tools and  
1306 samples in a single report. *Bioinformatics.* 2016;32: 3047–3048. doi:10.1093/bioinformatics/btw354
- 1307 114. Weisenfeld NI, Kumar V, Shah P, Church DM, Jaffe DB. Direct determination of diploid genome sequences.  
1308 *Genome Res.* 2017;27: 757–767. doi:10.1101/gr.214874.116
- 1309 115. Coombe L, Zhang J, Vandervalk BP, Chu J, Jackman SD, Birol I, et al. ARKS: chromosome-scale scaffolding  
1310 of human genome drafts with linked read kmers. *BMC Bioinformatics.* 2018;19: 234. doi:10.1186/s12859-  
1311 018-2243-x
- 1312 116. Bankevich A, Nurk S, Antipov D, Gurevich AA, Dvorkin M, Kulikov AS, et al. SPAdes: a new genome  
1313 assembly algorithm and its applications to single-cell sequencing. *J Comput Biol.* 2012;19: 455–477.  
1314 doi:10.1089/cmb.2012.0021
- 1315 117. Buchfink B, Xie C, Huson DH. Fast and sensitive protein alignment using DIAMOND. *Nat Methods.*  
1316 2015;12: 59–60. doi:10.1038/nmeth.3176
- 1317 118. Laetsch DR, Blaxter ML. BlobTools: Interrogation of genome assemblies. *F1000Res.* 2017;6:  
1318 doi:10.12688/f1000research.12232.1
- 1319 119. Prysacz LP, Gabaldón T. Redundans: an assembly pipeline for highly heterozygous genomes. *Nucleic Acids*  
1320 *Res.* 2016;44: e113. doi:10.1093/nar/gkw294
- 1321 120. Boetzer M, Henkel CV, Jansen HJ, Butler D, Pirovano W. Scaffolding pre-assembled contigs using SSPACE.  
1322 *Bioinformatics.* 2011;27: 578–579. doi:10.1093/bioinformatics/btq683
- 1323 121. Luo R, Liu B, Xie Y, Li Z, Huang W, Yuan J, et al. SOAPdenovo2: an empirically improved memory-  
1324 efficient short-read de novo assembler. *Gigascience.* 2012;1: 18. doi:10.1186/2047-217X-1-18

- 1325 122. Li H. Minimap2: pairwise alignment for nucleotide sequences. *Bioinformatics*. 2018;34: 3094–3100.  
1326 doi:10.1093/bioinformatics/bty191
- 1327 123. Alonge M, Soyk S, Ramakrishnan S, Wang X, Goodwin S, Sedlazeck FJ, et al. RaGOO: fast and accurate  
1328 reference-guided scaffolding of draft genomes. *Genome Biol*. 2019;20: 224. doi:10.1186/s13059-019-1829-6
- 1329 124. Salzberg SL, Phillippy AM, Zimin A, Puiu D, Magoc T, Koren S, et al. GAGE: A critical evaluation of  
1330 genome assemblies and assembly algorithms. *Genome Res*. 2012;22: 557–567. doi:10.1101/gr.131383.111
- 1331 125. Simão FA, Waterhouse RM, Ioannidis P, Kriventseva EV, Zdobnov EM. BUSCO: assessing genome  
1332 assembly and annotation completeness with single-copy orthologs. *Bioinformatics*. 2015;31: 3210–3212.  
1333 doi:10.1093/bioinformatics/btv351
- 1334 126. Hanson SJ, Stelzer C-P, Welch DBM, Logsdon JM Jr. Comparative transcriptome analysis of obligately  
1335 asexual and cyclically sexual rotifers reveals genes with putative functions in sexual reproduction, dormancy,  
1336 and asexual egg production. *BMC Genomics*. 2013;14: 412. doi:10.1186/1471-2164-14-412
- 1337 127. Dobin A, Davis CA, Schlesinger F, Drenkow J, Zaleski C, Jha S, et al. STAR: ultrafast universal RNA-seq  
1338 aligner. *Bioinformatics*. 2013;29: 15–21. doi:10.1093/bioinformatics/bts635
- 1339 128. Stanke M, Schöffmann O, Morgenstern B, Waack S. Gene prediction in eukaryotes with a generalized hidden  
1340 Markov model that uses hints from external sources. *BMC Bioinformatics*. 2006;7: 62. doi:10.1186/1471-  
1341 2105-7-62
- 1342 129. Stanke M, Diekhans M, Baertsch R, Haussler D. Using native and syntenically mapped cDNA alignments to  
1343 improve de novo gene finding. *Bioinformatics*. 2008;24: 637–644. doi:10.1093/bioinformatics/btn013
- 1344 130. Barnett DW, Garrison EK, Quinlan AR, Strömberg MP, Marth GT. BamTools: a C++ API and toolkit for  
1345 analyzing and managing BAM files. *Bioinformatics*. 2011;27: 1691–1692. doi:10.1093/bioinformatics/btr174
- 1346 131. Hoff KJ, Lange S, Lomsadze A, Borodovsky M, Stanke M. BRAKER1: Unsupervised RNA-Seq-Based  
1347 Genome Annotation with GeneMark-ET and AUGUSTUS. *Bioinformatics*. 2016;32: 767–769.  
1348 doi:10.1093/bioinformatics/btv661
- 1349 132. Hoff KJ, Lomsadze A, Borodovsky M, Stanke M. Whole-Genome Annotation with BRAKER. *Methods Mol*  
1350 *Biol*. 2019;1962: 65–95. doi:10.1007/978-1-4939-9173-0\_5
- 1351 133. Norling M, Jareborg N, Dainat J. EMBLmyGFF3: a converter facilitating genome annotation submission to  
1352 European Nucleotide Archive. *BMC Res Notes*. 2018;11: 584. doi:10.1186/s13104-018-3686-x
- 1353 134. Sievers F, Wilm A, Dineen D, Gibson TJ, Karplus K, Li W, et al. Fast, scalable generation of high-quality  
1354 protein multiple sequence alignments using Clustal Omega. *Mol Syst Biol*. 2011;7: 539.  
1355 doi:10.1038/msb.2011.75
- 1356 135. Kearse M, Moir R, Wilson A, Stones-Havas S, Cheung M, Sturrock S, et al. Geneious Basic: an integrated and  
1357 extendable desktop software platform for the organization and analysis of sequence data. *Bioinformatics*.  
1358 2012;28: 1647–1649. doi:10.1093/bioinformatics/bts199
- 1359 136. Nguyen L-T, Schmidt HA, von Haeseler A, Minh BQ. IQ-TREE: a fast and effective stochastic algorithm for  
1360 estimating maximum-likelihood phylogenies. *Mol Biol Evol*. 2015;32: 268–274. doi:10.1093/molbev/msu300
- 1361 137. Kalyaanamoorthy S, Minh BQ, Wong TKF, von Haeseler A, Jermini LS. ModelFinder: fast model selection  
1362 for accurate phylogenetic estimates. *Nat Methods*. 2017;14: 587–589. doi:10.1038/nmeth.4285
- 1363 138. Guindon S, Dufayard J-F, Lefort V, Anisimova M, Hordijk W, Gascuel O. New algorithms and methods to  
1364 estimate maximum-likelihood phylogenies: assessing the performance of PhyML 3.0. *Syst Biol*. 2010;59:  
1365 307–321. doi:10.1093/sysbio/syq010
- 1366 139. Hoang DT, Chernomor O, von Haeseler A, Minh BQ, Vinh LS. UFBoot2: Improving the Ultrafast Bootstrap  
1367 Approximation. *Mol Biol Evol*. 2018;35: 518–522. doi:10.1093/molbev/msx281
- 1368 140. Flynn JM, Hubble R, Goubert C, Rosen J, Clark AG, Feschotte C, et al. RepeatModeler2 for automated  
1369 genomic discovery of transposable element families. *Proc Natl Acad Sci U S A*. 2020;117: 9451–9457.  
1370 doi:10.1073/pnas.1921046117
- 1371 141. Bao W, Kojima KK, Kohany O. Repbase Update, a database of repetitive elements in eukaryotic genomes.  
1372 *Mob DNA*. 2015;6: 11. doi:10.1186/s13100-015-0041-9
- 1373 142. Bailly-Bechet M, Haudry A, Lerat E. “One code to find them all”: a perl tool to conveniently parse  
1374 RepeatMasker output files. *Mob DNA*. 2014;5: 13. doi:10.1186/1759-8753-5-13
- 1375 143. Revell LJ. phytools: an R package for phylogenetic comparative biology (and other things). *Methods Ecol*  
1376 *Evol*. 2012;3: 217–223. doi:10.1111/j.2041-210X.2011.00169.x
- 1377 144. R Core Team. R: A language and environment for statistical computing. 2016. Available: [https://www.R-](https://www.R-project.org/)  
1378 [project.org/](https://www.R-project.org/)
- 1379 145. Quesneville H, Bergman CM, Andrieu O, Autard D, Nouaud D, Ashburner M, et al. Combined evidence  
1380 annotation of transposable elements in genome sequences. *PLoS Comput Biol*. 2005;1: 166–175.  
1381 doi:10.1371/journal.pcbi.0010022
- 1382 146. Flutre T, Duprat E, Feuillet C, Quesneville H. Considering transposable element diversification in de novo  
1383 annotation approaches. *PLoS One*. 2011;6: e16526. doi:10.1371/journal.pone.0016526
- 1384 147. Wicker T, Sabot F, Hua-Van A, Bennetzen JL, Capy P, Chalhoub B, et al. A unified classification system for



- 1385 eukaryotic transposable elements. *Nat Rev Genet.* 2007;8: 973–982. doi:10.1038/nrg2165
- 1386 148. Ou S, Jiang N. LTR\_retriever: A Highly Accurate and Sensitive Program for Identification of Long Terminal  
1387 Repeat Retrotransposons. *Plant Physiol.* 2018;176: 1410–1422. doi:10.1104/pp.17.01310
- 1388 149. Pruitt KD, Tatusova T, Maglott DR. NCBI reference sequences (RefSeq): a curated non-redundant sequence  
1389 database of genomes, transcripts and proteins. *Nucleic Acids Res.* 2007;35: D61-5. doi:10.1093/nar/gkl842
- 1390 150. Agapow P-M, Burt A. Indices of multilocus linkage disequilibrium. *Mol Ecol Notes.* 2001;1: 101–102.  
1391 doi:10.1046/j.1471-8278.2000.00014.x
- 1392 151. Kamvar ZN, Tabima JF, Grünwald NJ. Poppr: an R package for genetic analysis of populations with clonal,  
1393 partially clonal, and/or sexual reproduction. *PeerJ.* 2014;2: e281. doi:10.7717/peerj.281
- 1394 152. Hartfield M, Wright SI, Agrawal AF. Coalescence and Linkage Disequilibrium in Facultatively Sexual  
1395 Diploids. *Genetics.* 2018;210: 683–701. doi:10.1534/genetics.118.301244
- 1396 153. Quinlan AR, Hall IM. BEDTools: a flexible suite of utilities for comparing genomic features. *Bioinformatics.*  
1397 2010;26: 841–842. doi:10.1093/bioinformatics/btq033
- 1398 154. Rice P, Longden I, Bleasby A. EMBOSS: the European Molecular Biology Open Software Suite. *Trends*  
1399 *Genet.* 2000;16: 276–277. doi:10.1016/s0168-9525(00)02024-2
- 1400 155. El-Gebali S, Mistry J, Bateman A, Eddy SR, Luciani A, Potter SC, et al. The Pfam protein families database in  
1401 2019. *Nucleic Acids Res.* 2019;47: D427–D432. doi:10.1093/nar/gky995
- 1402 156. Jones P, Binns D, Chang H-Y, Fraser M, Li W, McAnulla C, et al. InterProScan 5: genome-scale protein  
1403 function classification. *Bioinformatics.* 2014;30: 1236–1240. doi:10.1093/bioinformatics/btu031
- 1404 157. Garamszegi LZ, editor. *Modern Phylogenetic Comparative Methods and Their Application in Evolutionary*  
1405 *Biology: Concepts and Practice.* Springer, Berlin, Heidelberg; 2014. doi:10.1007/978-3-662-43550-2
- 1406 158. Hadfield JD. MCMC Methods for Multi-Response Generalized Linear Mixed Models: The MCMCglmm R  
1407 Package. *J Stat Softw.* 2010;33. doi:10.18637/jss.v033.i02
- 1408 159. de Villemereuil P, Nakagawa S. General Quantitative Genetic Methods for Comparative Biology. In:  
1409 Garamszegi LZ, editor. *Modern Phylogenetic Comparative Methods and Their Application in Evolutionary*  
1410 *Biology: Concepts and Practice.* Berlin, Heidelberg: Springer Berlin Heidelberg; 2014. pp. 287–303.  
1411 doi:10.1007/978-3-662-43550-2\_11
- 1412 160. Bates D, Mächler M, Bolker B, Walker S. Fitting Linear Mixed-Effects Models Using lme4. *Journal of*  
1413 *Statistical Software, Articles.* 2015;67: 1–48. doi:10.18637/jss.v067.i01
